# **Virological characteristics of the SARS-CoV-2 XBB variant derived from recombination of two Omicron subvariants**

Tomokazu Tamura<sup>1,30</sup>, Jumpei Ito<sup>2,30</sup>, Keiya Uriu<sup>2,3,30</sup>, Jiri Zahradnik<sup>4,5,30</sup>, Izumi Kida<sup>6,30</sup>, Hesham Nasser<sup>7,8,30</sup>, Maya Shofa<sup>9,10,30</sup>, Yoshitaka Oda<sup>11,30</sup>, Spyros Lytras<sup>12,30</sup>, Naganori Nao<sup>13,14</sup>, Yukari Itakura<sup>15</sup>, Sayaka Deguchi<sup>16</sup>, Rigel Suzuki<sup>1</sup>, Lei Wang<sup>11,17</sup>, MST Monira Begum<sup>7</sup>, Masumi Tsuda<sup>11,17</sup>, Yusuke Kosugi<sup>2,3</sup>, Shigeru Fujita<sup>2,3</sup>, Kumiko Yoshimatsu<sup>18</sup>, Saori Suzuki<sup>1</sup>, Hiroyuki Asakura<sup>19</sup>, Mami Nagashima<sup>19</sup>, Kenji Sadamasu<sup>19</sup>, Kazuhisa Yoshimura<sup>19</sup>, Yuki Yamamoto<sup>20</sup>, Tetsuharu Nagamoto<sup>20</sup>, Gideon Schreiber<sup>4</sup>, The Genotype to Phenotype Japan (G2P-Japan) Consortium, Terumasa Ikeda<sup>7</sup>, Takasuke Fukuhara<sup>1,21,22</sup>, Akatsuki Saito<sup>9,10,23</sup>, Shinya Tanaka<sup>11,17\*</sup>, Keita Matsuno<sup>6,14,24\*</sup>, Kazuo Takayama<sup>16,21\*</sup>, Kei Sato<sup>2,3,25,26,27,28,29\*</sup>

<sup>1</sup>Department of Microbiology and Immunology, Faculty of Medicine, Hokkaido University, Sapporo, Japan

<sup>2</sup>Division of Systems Virology, Department of Microbiology and Immunology, The Institute of Medical Science, The University of Tokyo, Tokyo, Japan

<sup>3</sup>Graduate School of Medicine, The University of Tokyo, Tokyo, Japan

<sup>4</sup>Department of Biomolecular Sciences, Weizmann Institute of Science, Rehovot, Israel

<sup>5</sup>First Medical Faculty at Biocev, Charles University, Vestec-Prague, Czechia

<sup>6</sup>Division of Risk Analysis and Management, International Institute for Zoonosis Control, Hokkaido University, Sapporo, Japan

<sup>7</sup>Division of Molecular Virology and Genetics, Joint Research Center for Human Retrovirus infection, Kumamoto University, Kumamoto, Japan

<sup>8</sup>Department of Clinical Pathology, Faculty of Medicine, Suez Canal University, Ismailia, Egypt

<sup>9</sup>Department of Veterinary Science, Faculty of Agriculture, University of Miyazaki, Miyazaki, Japan

<sup>10</sup>Graduate School of Medicine and Veterinary Medicine, University of Miyazaki, Miyazaki, Japan

<sup>11</sup>Department of Cancer Pathology, Faculty of Medicine, Hokkaido University, Sapporo, Japan

<sup>12</sup>Medical Research Council-University of Glasgow Centre for Virus Research, Glasgow, UK

<sup>13</sup>Division of International Research Promotion, International Institute for Zoonosis Control, Hokkaido University, Sapporo, Japan

<sup>14</sup>One Health Research Center, Hokkaido University, Sapporo, Japan

<sup>15</sup>Division of Molecular Pathobiology, International Institute for Zoonosis Control, Hokkaido University, Sapporo, Japan

<sup>16</sup>Center for iPS Cell Research and Application (CiRA), Kyoto University, Kyoto, Japan

44 <sup>17</sup>Institute for Chemical Reaction Design and Discovery (WPI-ICReDD),  
 45 Hokkaido University, Sapporo, Japan  
 46 <sup>18</sup>Institute for Genetic Medicine, Hokkaido University, Sapporo, Japan  
 47 <sup>19</sup>Tokyo Metropolitan Institute of Public Health, Tokyo, Japan  
 48 <sup>20</sup>HiLung, Inc., Kyoto, Japan  
 49 <sup>21</sup>AMED-CREST, Japan Agency for Medical Research and Development  
 50 (AMED), Tokyo, Japan  
 51 <sup>22</sup>Laboratory of Virus Control, Research Institute for Microbial Diseases, Osaka  
 52 University, Suita, Japan  
 53 <sup>23</sup>Center for Animal Disease Control, University of Miyazaki, Miyazaki, Japan  
 54 <sup>24</sup>International Collaboration Unit, International Institute for Zoonosis Control,  
 55 Hokkaido University, Sapporo, Japan  
 56 <sup>25</sup>International Research Center for Infectious Diseases, The Institute of Medical  
 57 Science, The University of Tokyo, Tokyo, Japan  
 58 <sup>26</sup>International Vaccine Design Center, The Institute of Medical Science, The  
 59 University of Tokyo, Tokyo, Japan  
 60 <sup>27</sup>Graduate School of Frontier Sciences, The University of Tokyo, Kashiwa,  
 61 Japan  
 62 <sup>28</sup>Collaboration Unit for Infection, Joint Research Center for Human Retrovirus  
 63 infection, Kumamoto University, Kumamoto, Japan  
 64 <sup>29</sup>CREST, Japan Science and Technology Agency, Kawaguchi, Japan  
 65 <sup>30</sup>These authors contributed equally  
 66  
 67 \*Corresponding authors:  
 68 tanaka@med.hokudai.ac.jp (Shinya Tanaka),  
 69 matsuk@czc.hokudai.ac.jp (Keita Matsuno),  
 70 kazuo.takayama@cira.kyoto-u.ac.jp (Kazuo Takayama),  
 71 KeiSato@g.ecc.u-tokyo.ac.jp (Kei Sato)  
 72  
 73 **Conflict of interest:** Yuki Yamamoto and Tetsuharu Nagamoto are founders  
 74 and shareholders of HiLung, Inc. Yuki Yamamoto is a co-inventor of patents  
 75 (PCT/JP2016/057254; "Method for inducing differentiation of alveolar epithelial  
 76 cells", PCT/JP2016/059786, "Method of producing airway epithelial cells"). The  
 77 other authors declare that no competing interests exist.  
 78  
 79 **Short title:** Characteristics of SARS-CoV-2 XBB (33/50 characters)  
 80 **Keywords:** SARS-CoV-2; COVID-19; Omicron; XBB; recombination;  
 81 transmissibility; immune resistance; pathogenicity

82 **Abstract** (139/150 words)

83 In late 2022, the SARS-CoV-2 Omicron subvariants have highly diversified, and  
 84 XBB is spreading rapidly around the world. Our phylogenetic analyses  
 85 suggested that XBB emerged by recombination of two co-circulating BA.2  
 86 lineages, BJ.1 and BM.1.1.1 (a progeny of BA.2.75), during the summer of 2022  
 87 around India. *In vitro* experiments revealed that XBB is the most profoundly  
 88 resistant variant to BA.2/5 breakthrough infection sera ever and is more  
 89 fusogenic than BA.2.75. Notably, the recombination breakpoint is located in the  
 90 receptor-binding domain of spike, and each region of recombined spike  
 91 conferred immune evasion and augmented fusogenicity to the XBB spike. Finally,  
 92 the intrinsic pathogenicity of XBB in hamsters is comparable to or even lower  
 93 than that of BA.2.75. Our multiscale investigation provided evidence suggesting  
 94 that XBB is the first documented SARS-CoV-2 variant increasing its fitness  
 95 through recombination rather than single mutations.

## 96 Introduction

97 The SARS-CoV-2 Omicron variant is the current variant of concern since the end  
 98 of 2021 (ref.<sup>1</sup>). As of December 2022, recently emerging Omicron subvariants  
 99 are under convergent evolution: recently emerging variants acquired  
 100 substitutions at the same residues of the spike (S) protein, such as R346, K444,  
 101 L452, N460, and F486<sup>2,3</sup>. For instance, Omicron BQ.1.1 variant, which is a  
 102 descendant of Omicron BA.5 and is currently becoming predominant in the  
 103 Western countries<sup>1</sup>, possesses all convergent substitutions, such as R346T,  
 104 K444T, L452R, N460K, and F486V. Recent studies including ours suggested  
 105 that L452R<sup>4-9</sup>, N460K<sup>2,6,10,11</sup>, and R346T<sup>2</sup> increase the binding affinity of  
 106 SARS-CoV-2 S protein to human angiotensin-converting enzyme 2 (ACE2), the  
 107 receptor for viral infection, while R346T<sup>12,13</sup>, K444T<sup>12</sup> and F486V<sup>2,4,5,12,14,15</sup>  
 108 contribute to evade antiviral humoral immunity induced by vaccination and  
 109 natural SARS-CoV-2 infection. Similar to the observations in BA.5 (ref.<sup>5</sup>) and  
 110 BA.2.75 (ref.<sup>10</sup>), combinational substitutions in S protein (1) to evade antiviral  
 111 humoral immunity in exchange for the decrease of ACE2 binding affinity (e.g.,  
 112 F486V) and (2) to enhance ACE2 binding affinity to compensate the decreased  
 113 affinity by immune evasion substitution (e.g., L452R and N460K) has been  
 114 frequently observed in recently emerging Omicron subvariants including BQ.1.1.  
 115 These observations suggest that acquiring these two types of substitutions in the  
 116 S protein is a trend for recently emerging Omicron subvariants to spread more  
 117 efficiently than prior ones.

118 In addition to the diversification and subsequent convergent evolution  
 119 of emerging Omicron subvariants (e.g., BQ.1.1), a recombinant variant, called  
 120 XBB, has recently emerged. The Omicron XBB variant likely originated by the  
 121 recombination of two BA.2 descendants, BJ.1 and BM.1.1.1 (a progeny of  
 122 BA.2.75)<sup>16</sup>. While the BQ.1 lineage is becoming predominant in Europe, XBB  
 123 has become predominant in India and Singapore and is spreading several  
 124 countries<sup>17</sup>. As of October 28, 2022, the WHO classifies XBB as an Omicron  
 125 subvariant under monitoring<sup>1</sup>. Recent studies including ours have revealed the  
 126 virological features of BQ.1 (refs.<sup>2,13,18</sup>). However, the features of XBB, another  
 127 Omicron subvariants of concern, are not fully elucidated. In this study, we  
 128 elucidated the virological characteristics of XBB, particularly its transmissibility,  
 129 immune resistance, ACE2 binding affinity, infectivity, fusogenicity and intrinsic  
 130 pathogenicity in a hamster model.

# Results

## Evolution and epidemics of the XBB variant

As of December 2022, most of the prevalent Omicron lineages, including BA.5, are descendants of BA.2 (**Fig. 1a**). Of these, highly diversified BA.2 subvariants, such as BA.2.75 and BJ.1, have emerged in South Asia and are referred to as the second-generation BA.2 variants (**Fig. 1a**). Recently, the XBB variant emerged as a recombinant lineage between the second generation BA.2 variants, BJ.1 and BM.1.1.1 (BA.2.75.3.1.1.1; a descendant of BA.2.75)<sup>16</sup> (**Fig. 1a**). XBB harbors the S substitutions R346T, N460K, and F486S, which have been convergently acquired during the Omicron evolution (**Fig. 1b**)<sup>2</sup>. To trace the recombination event that led to the emergence of the XBB variant, we retrieved all SARS-CoV-2 sequences deposited to GISAID (as of October 3, 2022) with PANGO lineage designation matching BJ.1, BM.1, XBB, and all their descendant lineages (including BM.1.1, BM.1.1.1, and XBB.1). Recombination analysis on the aligned set of sequences, using RDP5 (ref.<sup>19</sup>), robustly picks up a single recombination breakpoint unique to all XBB sequences at the genomic position 22,920 (matching the Wuhan-Hu-1 reference genome) (**Fig. 1c**). No evidence of recombination was found in the BJ.1 and BM.1 sequences in the dataset. Consistent with the result of the RDP5 analysis, the visual inspection of the nucleotide differences between the consensus sequences of XBB, BJ.1, and BM.1 (including BM.1.1 and BM.1.1.1) clearly illustrates that the XBB identity to BJ.1 ends at the genome position 22,942 and the XBB identity to BM.1 starts after position 22,896 (**Fig. 1c**). Together, our recombination analysis suggests that the recombination breakpoint is between positions 22,897 and 22,941, within the receptor binding domain (RBD) of S protein (corresponding to amino acid positions 445-460) (**Fig. 1c**).

We then split the sequence alignment at position 22,920 to determine the evolutionary history of each non-recombinant segment of the XBB genomes. The phylogenetic reconstructions recapitulate the recombination results, with the 5' end major parental sequence being derived from the BJ.1 clade and the 3' end minor parental sequence from the BM.1.1.1 clade (**Fig. 1d**). Using the longer 5' end non-recombinant part of these genomes, we estimated the emergence date of XBB based on the inferred root-to-tip regression (see **Methods**) (**Fig. 1d**). This analysis suggests that the XBB clade stemmed from the major BJ.1 clade in the span from July 22 to August 5, 2022 (**Fig. 1d**). Furthermore, we inferred the emergence region of XBB by a discrete ancestral state reconstruction utilizing a Markov model (see **Methods**). Most of the earlier isolates of XBB were sampled in India, and our analysis suggests that the ancestral state (i.e., the circulating region) of the most recent common ancestor (MRCA) of XBB sequences is likely India (**Fig. 1e and Extended Data Fig. S1b**). Together, our analyses suggest

171 that XBB emerged through the recombination of two co-circulating lineages,  
172 BJ.1 and BM.1.1.1, during the summer of 2022 in India or neighboring countries.

173 To trace the shift of viral fitness during the evolution of Omicron leading  
174 to the emergence of XBB, we estimated the effective reproduction number ( $R_e$ )  
175 of XBB-related variants based on the epidemic data of SARS-CoV-2 in India  
176 (from June 1 to November 15, 2022) (**Fig. 1f and Extended Data Fig. S1c and**  
177 **Supplementary Table 1**). BJ.1 and BM.1/BM.1.1/BA.1.1.1 showed higher  $R_e$   
178 compared with their parental lineages, BA.2.10 and BA.2.75, respectively.  
179 Furthermore, the  $R_e$  value of XBB is 1.23- and 1.20-times higher than those of  
180 the parental BJ.1 and BM.1.1.1, respectively (**Fig. 1f and Extended Data Fig.**  
181 **S1c and Supplementary Table 1**). Importantly, this is the first documented  
182 example of a SARS-CoV-2 variant increasing its fitness through recombination  
183 rather than single mutations.

184 As of December 2022, two viral lineages are expanding their epidemics  
185 around the world: BQ.1 lineages and XBB lineages. To investigate the  
186 prevalence of these two lineages in various geographic regions, we estimated  
187 the epidemic frequency of each variant as of November 15, 2022, in each county  
188 (**Fig. 1g and Supplementary Table 2**). BQ.1 lineages have spread and reached  
189 dominance in European, American, and African countries, probably reflecting  
190 the likelihood that BQ.1 emerged from the African continent<sup>20</sup> (**Fig. 1g**). On the  
191 other hand, XBB lineages have spread and reached dominance in South and  
192 Southeast Asian countries, such as India, Singapore, and Indonesia, reflecting  
193 the fact that XBB originated around India (**Fig. 1e,g**). Furthermore, we  
194 constructed a hierarchical Bayesian model and estimated the global average  
195 and country-specific  $R_e$  values of XBB lineages according to the epidemic data  
196 of countries where XBB lineages cocirculated with BQ.1 lineages (**Fig. 1h,i,**  
197 **Extended Data Fig. S1d and Supplementary Table 3**). Our analysis shows  
198 that the  $R_e$  values of XBB and XBB.1 (i.e., XBB harboring S:G252V) are 1.24  
199 and 1.26-times higher than that of BA.5 and are comparable with those of BQ.1  
200 and BQ.1.1 (**Fig. 1h and Extended Data Fig. S1d**). Together, our analyses  
201 show that both BQ.1 and XBB lineages, exhibiting a similar advantage in viral  
202 fitness, are becoming predominant in the Western and Eastern Hemispheres,  
203 respectively.

204

## 205 Immune resistance of XBB

206 To investigate the virological features of XBB, we first evaluated the immune  
207 resistance of XBB using HIV-1-based pseudoviruses. In the present study, we  
208 used the major S haplotype of XBB lineages as of October 3, 2022,  
209 corresponding to the S protein of XBB.1, for the following experiments (hereafter  
210 we simply refer to XBB.1 as XBB). In the case of breakthrough BA.2 infection  
211 sera, BA.2.75 did not exhibit significant resistance when compared to BA.2 (**Fig.**



212 **2a**), which is consistent with our prior study<sup>10</sup>. In contrast, we found that XBB  
213 exhibits a profound (30-fold) resistance to breakthrough BA.2 infection sera  
214 ( $P=0.0002$ , **Fig. 2a**). To determine amino acid substitutions conferring the  
215 profound resistance to the breakthrough anti sera, we constructed the BA.2 S  
216 mutants which harbor respective single substitutions present in XBB. We did not  
217 analyze the substitutions present also in BA.2.75 (e.g., G446S) since we have  
218 already analyzed these substitutions in our previous study<sup>10</sup>. As shown in **Fig.**  
219 **2a**, several substitutions such as V83A (2.1-fold,  $P=0.0034$ ), Y144del (2.9-fold,  
220  $P=0.0002$ ), Q183E (2.0-fold,  $P=0.0039$ ), R346T (2.1-fold,  $P=0.0005$ ), L368I  
221 (1.8-fold,  $P=0.042$ ), V445P (2.1-fold,  $P=0.0002$ ), F486S (3.0-fold,  $P=0.0002$ ),  
222 and F490S (2.7-fold,  $P=0.024$ ) conferred significant resistance to breakthrough  
223 BA.2 infection sera. Because the immune resistance conferred by respective  
224 substitution is relatively minor when compared to the resistance of XBB (**Fig. 2a**),  
225 our data suggest that multiple substitutions in the XBB S cooperatively  
226 contribute to the resistance against humoral immunity induced by breakthrough  
227 BA.2 infection.

228 Consistent with our previous study<sup>10</sup>, BA.2.75 showed a statistically  
229 significant (1.8-fold) resistance to breakthrough BA.5 infection sera when  
230 compared to BA.2 ( $P=0.0016$ , **Fig. 2b**). Moreover, XBB exhibited a profound  
231 (13-fold) resistance to breakthrough BA.5 infection sera ( $P<0.0001$ , **Fig. 2b**).  
232 Neutralization assay using the pseudoviruses with BA.2 derivatives revealed  
233 that the Y144del mutation (1.8-fold,  $P=0.016$ ) resulted in the resistance to  
234 breakthrough BA.5 infection sera (**Fig. 2b**). Furthermore, in our previous study,  
235 we showed that G446S, which is a common substitution of BA.2.75 and XBB,  
236 conferred immune resistance to breakthrough BA.5 infection sera<sup>10</sup>. Together,  
237 these observations suggest that these two mutations (Y144del and G446S)  
238 cooperatively contribute to the resistance against humoral immunity induced by  
239 breakthrough BA.5 infection.

240 To further evaluate the antigenicity of XBB S, we used the sera  
241 obtained from infected hamsters at 16 days post infection (d.p.i.). As shown in  
242 **Fig. 2c**, XBB exhibited profound resistance to the sera obtained from hamsters  
243 infected with BA.2, BA.5, BQ.1.1, and BA.2.75. Moreover, XBB infection hamster  
244 sera exhibited remarkable antiviral effect against only XBB (**Fig. 2c**). The  
245 cartography based on the neutralization dataset using hamster sera (**Fig. 2c**)  
246 showed that the cross-reactivity of each Omicron subvariant is correlated to their  
247 phylogenetic relationship (**Fig. 1a**). and the antigenicity of XBB is distinct from  
248 the other Omicron subvariants tested (**Fig. 2d**). These observations suggest that  
249 XBB is antigenically different from the other Omicron subvariants including  
250 BQ.1.1, and therefore, remarkably evades the BA.2/5 infection-induced herd  
251 immunity in the human population.

252

## 253 **ACE2 binding affinity of XBB S**

254 We then evaluated the features of XBB S that potentially affect viral infection and  
 255 replication. Yeast surface display assay<sup>2,10,21,22</sup> showed that the binding affinity  
 256 of XBB S RBD to human ACE2 receptor ( $1.00 \pm 0.069$ ) is significantly lower than  
 257 that of ancestral BA.2 S RBD ( $1.49 \pm 0.054$ ) (**Fig. 3a**). As described above (**Fig.**  
 258 **1a–c**), the four RBD substitutions in XBB compared to BA.2, D339H, G446S,  
 259 N460K and R493Q, are common to BA.2.75 since a part of RBD of XBB S is  
 260 derived from the BA.2.75/BM.1 lineage. In our previous studies<sup>2,10</sup>, we  
 261 demonstrated that the N460K substitution augments ACE2 binding affinity. To  
 262 address whether other substitutions in the XBB S affect the binding affinity of S  
 263 RBD to human ACE2, we prepared a repertoire of BA.2 S RBD that possesses  
 264 an XBB-specific substitution compared to BA.2. Consistent with our recent  
 265 study<sup>2,10</sup>, the R346T substitution, which is common in both XBB and BQ.1.1,  
 266 significantly increased the binding affinity of BA.2 S RBD to human ACE2 (**Fig.**  
 267 **3a**). Additionally, the L368I substitution also augmented ACE2 binding affinity  
 268 (**Fig. 3a**). On the other hand, the F486S substitution significantly decreased  
 269 ACE2 binding affinity (**Fig. 3a**). Because the F486V substitution also decreased  
 270 ACE2 binding affinity<sup>5</sup>, our data suggest that the amino acid substitution at F486  
 271 leads to attenuated ACE2 binding affinity. Our results suggested that the  
 272 enhanced binding affinity of XBB S RBD compared to BA.2 S RBD is attributed  
 273 to at least three substitutions in the RBD: R346T, L368I and N460K<sup>2,10</sup>.  
 274 Nevertheless, the  $K_D$  value of XBB S RBD was clearly higher than that of  
 275 BA.2.75 S RBD ( $0.18 \pm 0.069$ ) (**Fig. 3a**). In our prior study<sup>10</sup>, we showed that the  
 276 D339H substitution contributes to the augment of ACE2 binding affinity only  
 277 when the backbone is the BA.2.75 S RBD. Therefore, the profound binding  
 278 affinity of BA.2.75 S RBD to human ACE2 would be attributed to the  
 279 conformation that is composed of multiple substitutions in the BA.2.75 S RBD.

280 We next assessed viral infectivity using pseudoviruses. As shown in  
 281 **Fig. 3b**, the infectivity of XBB pseudovirus was 7.6-fold greater than that of BA.2  
 282 pseudovirus. Consistent with the results of yeast surface display assay (**Fig. 3a**),  
 283 two substitutions in the RBD, R346T (1.9-fold) and L368I (2.2-fold), significantly  
 284 increased pseudovirus infectivity (**Fig. 3b**). Additionally, although two  
 285 substitutions in the NTD, Y144del (0.18-fold) and G252V (0.54-fold), significantly  
 286 decreased pseudovirus infectivity, a substitution in the NTD, V83A (3.3-fold),  
 287 significantly increased (**Fig. 3b**). Altogether, our results suggest that the XBB S  
 288 augments its infectious potential through the multiple substitutions in the RBD  
 289 (R346T, L368I and N460K) and NTD (V83A).

290 To assess the association of TMPRSS2 usage with the increased  
 291 pseudovirus infectivity of XBB, we used HEK293-ACE2/TMPRSS2 cells and  
 292 HEK293-ACE2 cells, on which endogenous surface TMPRSS2 is undetectable<sup>23</sup>,  
 293 as target cells. As shown in **Fig. 3c**, the infectivity of XBB pseudovirus was not



increased by TMPRSS2 expression, suggesting that TMPRSS2 is not associated with an increase in the infectivity of XBB pseudovirus.

### Fusogenicity of XBB S

The fusogenicity of XBB S was measured by the SARS-CoV-2 S-based fusion assay<sup>2,5,10,23-28</sup>. We first assessed the fusogenicity of BA.2.75. Consistent with previous studies<sup>10,18</sup>, the BA.2.75 S exhibited higher fusogenicity than the BA.2 S (**Extended Data Fig. 2a,b**). The assay using the BA.2 S derivatives that harbor respective BA.2.75-specific substitutions revealed that only the N460K substitution significantly increased fusogenicity (**Extended Data Fig. 2b**). We then assessed the fusogenicity of XBB S. As shown in **Fig. 3d**, the surface expression level of XBB was significantly lower than those of BA.2 and BA.2.75. The S-based fusion assay showed that the XBB S is significantly more fusogenic than BA.2 S (2.2-fold) and BA.2.75 S (1.5-fold) (**Fig. 3e**). To assess the determinant substitutions in the XBB S that are responsible for augmented fusogenicity, we used the BA.2 S-based derivatives that harbor respective XBB-specific substitutions. We revealed that particularly two substitutions, V83A and R346T, significantly increased fusogenicity (**Fig. 3e**). Together with the experiments focusing on BA.2.75 S (**Extended Data Fig. 2b**), our results suggest that two substitutions in the RBD (R346T and N460K) and a substitution in the NTD (V83A) contribute to the augmented fusogenicity of XBB S.

### Virological characteristics of XBB *in vitro*

To investigate the growth kinetics of XBB in *in vitro* cell culture systems, we inoculated clinical isolates of BA.2<sup>23</sup>, BA.2.75<sup>10</sup>, and XBB into multiple cell cultures. The growth kinetics of XBB in Vero cells (**Fig. 3f**), Calu-3 cells (**Fig. 3h**), human airway organoid-derived air-liquid interface (AO-ALI) system (**Fig. 3i**), and human induced pluripotent stem cell (iPSC)-derived airway epithelial cells (**Fig. 3j**) were comparable with those of BA.2.75. On the other hand, XBB more efficiently expanded in VeroE6/TMPRSS2 cells than BA.2.75 (**Fig. 3g**). Similar to our previous study<sup>10</sup>, the growth of BA.2.75 was significantly greater than that of BA.2 in human iPSC-derived alveolar epithelial cells (**Fig. 3k**). However, XBB was less replicative than BA.2.75 in this culture system (**Fig. 3k**).

To quantitatively assess the impact of XBB infection on the airway epithelial-endothelial barriers, we used an airway-on-a-chips system<sup>2,10,29,30</sup>. By measuring the amount of virus that invades from the top channel (**Fig. 3l, left**) to the bottom channel (**Fig. 3l, right**), we are able to evaluate the ability of viruses to disrupt the airway epithelial-endothelial barriers. Notably, the percentage of virus that invaded the bottom channel of XBB-infected airway-on-chips was significantly higher than that of BA.2.75-infected airway-on-chips (**Fig. 3m**).

334 Together with the findings of S-based fusion assay (**Fig. 3e**), these results  
335 suggest that XBB is higher fusogenic than BA.2.75.

336

### 337 **Virological characteristics of XBB *in vivo***

338 To investigate the virological features of XBB *in vivo*, we inoculated clinical  
339 isolates of Delta<sup>26</sup>, BA.2.75<sup>10</sup>, and XBB. Consistent with our previous  
340 studies<sup>2,10,25,26</sup>, Delta infection resulted in weight loss (**Fig. 4a, left**). On the other  
341 hand, the body weights of BA.2.75- and XBB-infected hamsters were stable and  
342 comparable (**Fig. 4a, left**). We then analyzed the pulmonary function of infected  
343 hamsters as reflected by two parameters, enhanced pause (Penh) and the ratio  
344 of time to peak expiratory flow relative to the total expiratory time (Rpef). Among  
345 the four groups, Delta infection resulted in significant differences in these two  
346 respiratory parameters compared to XBB (**Fig. 4a, middle and right**),  
347 suggesting that XBB is less pathogenic than Delta. In contrast, although the  
348 Penh and Rpef values of XBB-infected hamsters were significantly different from  
349 those of uninfected hamsters, these were comparable to those of  
350 BA.2.75-infected hamsters (**Fig. 4a, middle and right**). These observations  
351 suggest that the pathogenicity of XBB is comparable to that of BA.2.75.

352 To address the viral spread in hamsters, we measured the viral RNA  
353 load in the oral swab. Although the viral RNA loads of the hamsters infected with  
354 XBB were significantly lower than those infected with Delta, there was no  
355 statistical difference between XBB and BA.2.75 (**Fig. 4b, left**). To assess the  
356 efficacy of viral spread in the respiratory tissues, we collected the lungs of  
357 infected hamsters at 2 and 5 d.p.i. and separated them into the hilum and  
358 periphery regions. However, the viral RNA loads in both lung hilum and  
359 periphery of XBB-infected hamsters were significantly lower than those of  
360 BA.2.75- and Delta-infected hamsters (**Fig. 4b, middle and right**), suggesting  
361 that XBB less efficiently spreads in the lungs of infected hamsters than BA.2.75  
362 and XBB. We then investigated the viral spread in the respiratory tissues by  
363 immunohistochemical (IHC) analysis targeting viral nucleocapsid (N) protein. As  
364 shown in **Fig. 4c and Extended Data Fig. 3a**, the percentage of N-positive cells  
365 in the lungs of XBB-infected hamsters was significantly lower than those of  
366 BA.2.75- and Delta-infected hamsters. These data suggest that the spreading  
367 efficiency of XBB in the lungs of infected hamsters is comparable with or even  
368 lower than that of BA.2.75.

369

### 370 **Intrinsic pathogenicity of XBB**

371 To investigate the pathogenicity of XBB in the lung, the formalin-fixed right lungs  
372 of infected hamsters were analyzed by carefully identifying the four lobules and  
373 main bronchus and lobar bronchi sectioning each lobe along with the bronchial  
374 branches. Histopathological scoring was performed as described in the previous

375 studies<sup>2,5,10,23,25,26</sup>. Briefly, bronchitis or bronchiolitis, hemorrhage or congestion,  
 376 alveolar damage with epithelial apoptosis and macrophage infiltration, type II  
 377 pneumocytes and the area of the hyperplasia of large type II pneumocytes were  
 378 evaluated by certified pathologists and the degree of these pathological findings  
 379 were arbitrarily scored using a four-tiered system as 0 (negative), 1 (weak), 2  
 380 (moderate), and 3 (severe)<sup>2,5,10,23,25,26</sup>. Similar to our previous studies<sup>2,10,25,26</sup>,  
 381 four out of the five histological parameters as well as the total score of  
 382 Delta-infected hamsters were significantly greater than those of XBB-infected  
 383 hamsters (**Fig. 4e**). When we compared the histopathological scores of two  
 384 Omicron subvariants, the scores of type II pneumocytes and the area of the  
 385 hyperplasia of large type II pneumocytes, and total histology score of  
 386 XBB-infected hamsters were comparable with those of BA.2.75-infected  
 387 hamsters (**Fig. 4e**). Altogether, these histopathological analyses suggest that  
 388 the intrinsic pathogenicity of XBB is lower than that of Delta and comparable with  
 389 that of BA.2.75.

## 390 Discussion

391 Here, we illuminated the evolutionary and epidemic dynamics of XBB variant, a  
 392 recombinant lineage rapidly spreading around the world. Our phylogenetic  
 393 analyses suggested that XBB emerged through the recombination of two  
 394 co-circulating BA.2 lineages, BJ.1 and BM.1.1.1 (a progeny of BA.2.75), during  
 395 the summer of 2022 in India or its neighboring countries (**Fig. 1**). Furthermore,  
 396 XBB shows substantially higher  $R_e$  than the parental lineages, suggesting that  
 397 the recombination event increased  $R_e$  (i.e., viral fitness). To our knowledge, this  
 398 is the first documented example of a SARS-CoV-2 variant increasing its fitness  
 399 through recombination rather than single mutations. Furthermore, we showed  
 400 that the  $R_e$  values of XBB lineages are comparable with or slightly higher than  
 401 those of BQ.1 lineages, and XBB and BQ.1 lineages are becoming dominants in  
 402 Eastern and Western Hemisphere, respectively. Since XBB lineages are rapidly  
 403 spreading also in Western countries such as the USA, this regional difference is  
 404 likely explained simply by the distance from the emergence regions of these  
 405 lineages rather than caused by the fact that viral fitness changes depending on  
 406 circulated regions. Together, although XBB now circulates mainly in countries  
 407 around India, this variant has a potential to spread worldwide in the near future.

408 Compared to BA.5, BA.2.75 and even BQ.1.1 (ref.<sup>2</sup>), the most  
 409 remarkable feature of XBB is the profound resistance to antiviral humoral  
 410 immunity induced by breakthrough infections of prior Omicron subvariants (**Fig.**  
 411 **2**). In fact, our analyses showed that 10 out of 14 breakthrough BA.2 infection  
 412 sera and 9 out of 20 breakthrough BA.5 infection sera fail to neutralize XBB. The  
 413 neutralization experiments using single mutants showed that multiple  
 414 substitutions in the XBB S protein cooperatively contribute to the immune  
 415 resistance of XBB, and particularly, not only the substitutions in the RBD but also  
 416 at least a mutation in the NTD, Y144del, closely associates with the immune  
 417 resistant property of XBB. The effect of Y144del mutation on immune resistance  
 418 is reported in a recent study by Cao et al.<sup>12</sup>, and this mutation has been  
 419 observed in previous variants of concern such as Alpha and Omicron BA.1.  
 420 Furthermore, we previously showed that the Mu variant, one of the previous  
 421 variants of interest, also has a mutation in the region including Y144 (i.e.,  
 422 YY144-145TSN), which contributes to the robust immune escape of this  
 423 variant<sup>31,32</sup>. Additionally, the region including Y144 is proposed that it is one of  
 424 the major epitopes of NTD targeting neutralization antibodies<sup>33</sup>. Together, these  
 425 observations suggest that Y144del mutation in XBB S contributed to escape  
 426 from these NTD targeting neutralization antibodies.

427 A series of our previous studies<sup>2,5,10</sup> showed that the substitutions in S  
 428 proteins associating with the escape from humoral immunity tend to lead to  
 429 acquire substitutions enhancing the ACE2 binding affinity or viral infectivity  
 430 probably to compensate for the negative effects of the immune

431 escape-associated substitutions on the ACE2 binding affinity. In the present  
432 study, we show that XBB harbors both the immune escape-associated  
433 substitutions (i.e., Y144del and F486S) and the infectivity-enhancing  
434 substitutions (i.e., V83A and N460K). Importantly, XBB emerged through  
435 recombination in the S gene, and Y144del and V83A are located on the 5'  
436 recombinant fragment while F486S and N460K are on the 3' fragment. This  
437 means that XBB acquired two sets of a pair of immune escape-associated and  
438 infectivity-enhancing substitutions by only one recombination event. Harboring  
439 the two sets of the substitution pairs would be one of the causes why XBB shows  
440 higher  $R_e$  than other Omicron subvariants. Together, although XBB emerged via  
441 a unique evolutionary pathway, our data suggest that XBB also follows the same  
442 evolutionary rule with other Omicron subvariants.

443 Although BQ.1.1, another Omicron subvariant of concern at the end of  
444 2022, acquired these two types of mutation by convergent substitutions<sup>2</sup>, XBB  
445 acquired them by a recombination event. In terms of the evolutionary strategy to  
446 acquire these two types of mutations, XBB emerged in a unique way.

447 In our previous studies focusing on some Omicron subvariants such as  
448 BA.1 (ref.<sup>25</sup>), BA.2 (ref.<sup>23</sup>), BA.5 (ref.<sup>5</sup>), and BA.2.75 (ref.<sup>10</sup>), viral fusogenicity in  
449 *in vitro* experimental setup was well correlated to viral intrinsic pathogenicity in a  
450 hamster model. However, although the fusogenicity of XBB was greater than  
451 that of BA.2.75, one of the parental lineages of XBB, the intrinsic pathogenicity  
452 of XBB was comparable or even lower than that of BA.2.75. The discrepancy  
453 between viral fusogenicity and intrinsic pathogenicity was also observed in  
454 another Omicron subvariant of concern at the end of 2022, BQ.1.1 (ref.<sup>2</sup>). The  
455 discrepancy between viral fusogenicity and intrinsic pathogenicity may be  
456 explained by at least three possibilities. First, certain mutations in the non-S  
457 region of the XBB genome can attenuate viral pathogenicity augmented by the  
458 higher fusogenicity compared with BA.2.75. There are at least seven  
459 substitutions in the non-S region of XBB when compared to that of BA.2.75, and  
460 some of these mutations may attenuate the viral intrinsic pathogenicity  
461 (**Extended Data Fig. 1a**). Second, a theoretical study by Sasaki, Lion, and  
462 Boots provided a possibility that antigenic escape can augment viral  
463 pathogenicity<sup>34</sup>. Since we demonstrated that at least two descendants of BA.2,  
464 BA.5 (ref.<sup>5</sup>) and BA.2.75 (ref.<sup>10</sup>), increased their intrinsic pathogenicity, this  
465 theory may explain the evolution of Omicron. More importantly, this theory also  
466 predicts that there is a limitation to increase viral pathogenicity<sup>34</sup>. Together with  
467 our observations, it might be possible to assume that the pathogenicity of  
468 Omicron lineage already reaches a plateau. Third, in the cases of BQ.1.1 (ref.<sup>2</sup>)  
469 and XBB, it might be possible that the tropism and affinity of S proteins of these  
470 variants are different between human ACE2 and hamster ACE2, and therefore,  
471 a hamster model may not reproduce the human condition.

472           In summary, our results suggested that XBB is highly transmissible and  
 473 resistant to the antiviral humoral immunity induced by breakthrough infections of  
 474 prior Omicron variants. Although various “local variants” including XBB have  
 475 simultaneously and convergently emerged in late 2022, local variants showing a  
 476 higher transmissibility will eventually spread to the whole world, like XBB. Therefore,  
 477 continued in-depth viral genomic surveillance and real-time evaluation of the risk  
 478 of newly emerging SARS-CoV-2 variants, even though considered local variants  
 479 at the time of emergence, should be crucial.



## 480 **Author Contributions**

481 Jumpei Ito performed bioinformatics, modeling, and statistical analysis.  
 482 Jumpei Ito and Spyros Lytras performed phylogenetic analyses.  
 483 Keiya Uriu, Hesham Nasser, Maya Shofa, Sayaka Deguchi, MST Monira Begum,  
 484 Yusuke Kosugi, Shigeru Fujita, Terumasa Ikeda, Akatsuki Saito and Kazuo  
 485 Takayama performed cell culture experiments.  
 486 Tomokazu Tamura, Izumi Kida, Naganori Nao, Yukari Itakura, Rigel Suzuki,  
 487 Kumiko Yoshimatsu, Saori Suzuki, Takasuke Fukuhara and Keita Matsuno  
 488 performed animal experiments.  
 489 Yoshitaka Oda, Lei Wang, Masumi Tsuda and Shinya Tanaka performed  
 490 histopathological analysis.  
 491 Jiri Zahradnik and Gideon Schreiber performed yeast surface display assay.  
 492 Sayaka Deguchi and Kazuo Takayama prepared AO, AO-ALI and  
 493 airway-on-a-chip systems.  
 494 Yuki Yamamoto and Tetsuharu Nagamoto performed generation and provision  
 495 of human iPSC-derived airway and alveolar epithelial cells.  
 496 Hiroyuki Asakura, Mami Nagashima, Kenji Sadamasu and Kazuhisa Yoshimura  
 497 performed viral genome sequencing analysis.  
 498 Jumpei Ito performed statistical, modelling, and bioinformatics analyses.  
 499 Jumpei Ito, Terumasa Ikeda, Takasuke Fukuhara, Akatsuki Saito, Shinya  
 500 Tanaka, Keita Matsuno, Kazuo Takayama and Kei Sato designed the  
 501 experiments and interpreted the results.  
 502 Jumpei Ito and Kei Sato wrote the original manuscript.  
 503 All authors reviewed and proofread the manuscript.  
 504 The Genotype to Phenotype Japan (G2P-Japan) Consortium contributed to the  
 505 project administration.

## 507 **Conflict of interest**

508 Yuki Yamamoto and Tetsuharu Nagamoto are founders and shareholders of  
 509 HiLung, Inc. Yuki Yamamoto is a co-inventor of patents (PCT/JP2016/057254;  
 510 "Method for inducing differentiation of alveolar epithelial cells",  
 511 PCT/JP2016/059786, "Method of producing airway epithelial cells"). The other  
 512 authors declare that no competing interests exist.

## 514 **Acknowledgments**

515 We would like to thank all members belonging to The Genotype to Phenotype  
 516 Japan (G2P-Japan) Consortium. We thank Dr. Kenzo Tokunaga (National  
 517 Institute for Infectious Diseases, Japan) and Dr. Jin Gohda (The University of  
 518 Tokyo, Japan) for providing reagents. We also thank National Institute for  
 519 Infectious Diseases, Japan for providing clinical isolates of BQ.1.1 (strain  
 520 TY41-796-P1; GISAID ID: EPI\_ISL\_15579783) and BA.2 (strain TY40-385;

521 GISAID ID: EPI\_ISL\_9595859). We appreciate the technical assistance from  
522 The Research Support Center, Research Center for Human Disease Modeling,  
523 Kyushu University Graduate School of Medical Sciences. We gratefully  
524 acknowledge all data contributors, i.e. the Authors and their Originating  
525 laboratories responsible for obtaining the specimens, and their Submitting  
526 laboratories for generating the genetic sequence and metadata and sharing via  
527 the GISAID Initiative, on which this research is based. The super-computing  
528 resource was provided by Human Genome Center at The University of Tokyo.

529 This study was supported in part by AMED SCARDA Japan Initiative  
530 for World-leading Vaccine Research and Development Centers "UTOPIA"  
531 (JP223fa627001, to Kei Sato), AMED SCARDA Program on R&D of new  
532 generation vaccine including new modality application (JP223fa727002, to Kei  
533 Sato); AMED Research Program on Emerging and Re-emerging Infectious  
534 Diseases (JP21fk0108574, to Hesham Nasser; JP21fk0108481, to Akatsuki  
535 Saito; JP21fk0108465, to Akatsuki Saito; JP21fk0108493, to Takasuke  
536 Fukuhara; JP22fk0108617 to Takasuke Fukuhara; JP22fk0108146, to Kei Sato;  
537 JP21fk0108494 to G2P-Japan Consortium, Keita Matsuno, Shinya Tanaka,  
538 Terumasa Ikeda, Takasuke Fukuhara, and Kei Sato; JP21fk0108425, to Kazuo  
539 Takayama, Akatsuki Saito and Kei Sato; JP21fk0108432, to Kazuo Takayama,  
540 Takasuke Fukuhara and Kei Sato); AMED Research Program on HIV/AIDS  
541 (JP22fk0410033, to Akatsuki Saito; JP22fk0410047, to Akatsuki Saito;  
542 JP22fk0410055, to Terumasa Ikeda; and JP22fk0410039, to Kei Sato); AMED  
543 CRDF Global Grant (JP22jk0210039 to Akatsuki Saito); AMED Japan Program  
544 for Infectious Diseases Research and Infrastructure (JP22wm0325009, to  
545 Akatsuki Saito; JP22wm0125008 to Keita Matsuno); AMED CREST  
546 (JP21gm1610005, to Kazuo Takayama); JST PRESTO (JPMJPR22R1, to  
547 Jumpei Ito); JST CREST (JPMJCR20H4, to Kei Sato); JSPS KAKENHI  
548 Grant-in-Aid for Scientific Research C (22K07103, to Terumasa Ikeda); JSPS  
549 KAKENHI Grant-in-Aid for Scientific Research B (21H02736, to Takasuke  
550 Fukuhara); JSPS KAKENHI Grant-in-Aid for Early-Career Scientists (22K16375,  
551 to Hesham Nasser; 20K15767, Jumpei Ito); JSPS Core-to-Core Program (A.  
552 Advanced Research Networks) (JPJSCCA20190008, Kei Sato); JSPS Research  
553 Fellow DC2 (22J11578, to Keiya Uriu); JSPS Leading Initiative for Excellent  
554 Young Researchers (LEADER) (to Terumasa Ikeda); World-leading Innovative  
555 and Smart Education (WISE) Program 1801 from the Ministry of Education,  
556 Culture, Sports, Science and Technology (MEXT) (to Naganori Nao); The Tokyo  
557 Biochemical Research Foundation (to Kei Sato); Takeda Science Foundation (to  
558 Terumasa Ikeda); Mochida Memorial Foundation for Medical and  
559 Pharmaceutical Research (to Terumasa Ikeda); The Naito Foundation (to  
560 Terumasa Ikeda); Shin-Nihon Foundation of Advanced Medical Research (to  
561 Terumasa Ikeda); Waksman Foundation of Japan (to Terumasa Ikeda); an

intramural grant from Kumamoto University COVID-19 Research Projects (AMABIE) (to Terumasa Ikeda); Ito Foundation Research Grant R4 (to Akatsuki Saito); and the project of National Institute of Virology and Bacteriology, Programme EXCELES, funded by the European Union, Next Generation EU (LX22NPO5103, to Jiri Zahradnik).

# **Consortia**

Hirofumi Sawa<sup>7,13,14</sup>, Marie Kato<sup>11</sup>, Zannatul Ferdous<sup>11</sup>, Hiromi Mouri<sup>11</sup>, Kenji Shishido<sup>11</sup>, Naoko Misawa<sup>2</sup>, Izumi Kimura<sup>2</sup>, Lin Pan<sup>2</sup>, Mai Suganami<sup>2</sup>, Mika Chiba<sup>2</sup>, Ryo Yoshimura<sup>2</sup>, Kyoko Yasuda<sup>2</sup>, Keiko Iida<sup>2</sup>, Naomi Ohsumi<sup>2</sup>, Adam P. Strange<sup>2</sup>, Daniel Sauter<sup>2,30</sup>, So Nakagawa<sup>31</sup> Jiaqi Wu<sup>31</sup>, Rina Hashimoto<sup>16</sup>, Yukio Watanabe<sup>16</sup>, Ayaka Sakamoto<sup>16</sup>, Naoko Yasuhara<sup>16</sup>, Takao Hashiguchi<sup>32</sup>, Tateki Suzuki<sup>32</sup>, Kanako Kimura<sup>32</sup>, Jiei Sasaki<sup>32</sup>, Yukari Nakajima<sup>32</sup>, Hisano Yajima<sup>32</sup>, Kotaro Shirakawa<sup>32</sup>, Akifumi Takaori-Kondo<sup>32</sup>, Kayoko Nagata<sup>32</sup>, Yasuhiro Kazuma<sup>32</sup>, Ryosuke Nomura<sup>32</sup>, Yoshihito Horisawa<sup>32</sup>, Yusuke Tashiro<sup>32</sup>, Yugo Kawa<sup>32</sup>, Takashi Irie<sup>33</sup>, Ryoko Kawabata<sup>33</sup>, Ryo Shimizu<sup>7</sup>, Otowa Takahashi<sup>7</sup>, Kimiko Ichihara<sup>7</sup>, Chihiro Motozono<sup>34</sup>, Mako Toyoda<sup>34</sup>, Takamasa Ueno<sup>34</sup>, Yuki Shibatani<sup>9</sup>, Tomoko Nishiuchi<sup>9</sup>

<sup>30</sup>University Hospital Tübingen, Tübingen, Germany

<sup>31</sup>Tokai University School of Medicine, Isehara, Japan

<sup>32</sup>Kyoto University, Kyoto, Japan

<sup>33</sup>Hiroshima University, Hiroshima, Japan

<sup>34</sup>Kumamoto University, Kumamoto, Japan

## 587 **Figure legends**

### 588 **Fig. 1. Phylogenetic and epidemic analyses of the XBB lineage**

589 **a**, Phylogenetic tree of representative sequences from PANGO lineages of  
590 interest: BA.1, BA.2, BA.4, BA.5, BA.2.75, BJ.1, and BM.1.1.1, rooted on a B.1.1  
591 outgroup (not shown). The recombinant parents of XBB are annotated on the  
592 tree as cartoon clades.

593 **b**, Amino acid differences in the S proteins of Omicron lineages.

594 **c**, Nucleotide differences between the consensus sequences of the BJ.1, BM.1  
595 (including BM.1.1/BM.1.1.1) lineages and the XBB (including XBB.1) lineage,  
596 visualized with snipit (<https://github.com/aineniameh/snipit>).

597 **d**, Maximum likelihood time-calibrated phylogeny of the 5' non-recombinant  
598 segment (1–22,920) of the XBB variant (left) and non-calibrated phylogeny of  
599 the 3' non-recombinant segment (22,920–29,903) (right). Both trees are rooted  
600 on a BA.2 outgroup (not shown).

601 **e**, Ancestral state reconstruction of the circulated regions of viruses. The  
602 time-calibrated tree shown in **Fig. 1d, left** is inherited in this analysis. Phylogeny  
603 related to XBB is only shown. Black circles on tips indicate samples from India.  
604 Branch color indicates the ancestral likelihood of the presence in India. In  
605 addition, the ancestral likelihood value for the MRCA of XBB lineages is shown  
606 as a pie chart. See also **Extended Data Fig. S1a**.

607 **f**, Relative  $R_e$  values for viral lineages in India, assuming a fixed generation time  
608 of 2.1 days. The  $R_e$  of BA.2 is set at 1. Dot color indicates the posterior mean of  
609 the  $R_e$ , and an arrow indicate phylogenetic relationship. See also **Extended**  
610 **Data Fig. S1b**.

611 **g**, Difference in the circulated regions between BQ.1 and XBB lineages.  
612 Estimated lineage frequency as of November 15<sup>th</sup>, 2022 in each country is  
613 shown. Countries with  $\geq 50\%$  and  $\geq 20\%$  frequencies are annotated for the BQ.1  
614 and XBB lineages, respectively.

615 **h**, Relative  $R_e$  values for viral lineages, assuming a fixed generation time of 2.1  
616 days. The  $R_e$  value of BA.5 is set at 1. The posterior (violin), posterior mean (dot),  
617 and 95% Bayesian confidential interval (CI; line) are shown. The global average  
618 values estimated by a hierarchical Bayesian model<sup>23</sup> are shown. See also  
619 **Extended Data Fig. S1c**.

620 **i**, Estimated lineage dynamics in each country where BQ.1 and XBB lineages  
621 cocirculated.

### 622 **Fig. 2. Immune resistance of XBB**

624 Neutralization assays were performed with pseudoviruses harboring the S  
625 proteins of BA.2, BA.5, BQ.1.1, BA.2.75 and XBB. The BA.2 S-based derivatives  
626 are included in **a and b**. The following sera were used.

627 **a,b**, Convalescent sera from fully vaccinated individuals who had been infected  
 628 with BA.2 after full vaccination (9 2-dose vaccinated and 5 3-dose vaccinated. 14  
 629 donors in total) (**a**), and BA.5 after full vaccination (2 2-dose vaccinated donors,  
 630 17 3-dose vaccinated donors and 1 4-dose vaccinated donors. 20 donors in  
 631 total) (**b**).  
 632 **c**, Sera from hamsters infected with BA.2 (12 hamsters), BA.5 (12 hamsters),  
 633 BQ.1.1 (6 hamsters), BA.2.75 (12 hamsters), and XBB (6 hamsters).  
 634 **d**, Antigenic cartography based on the results of neutralization assays using  
 635 hamster sera (**Fig. 2c**).  
 636 Assays for each serum sample were performed in triplicate to determine the  
 637 50% neutralization titer (NT<sub>50</sub>). Each dot represents one NT<sub>50</sub> value, and the  
 638 geometric mean and 95% CI are shown. Statistically significant differences were  
 639 determined by two-sided Wilcoxon signed-rank tests. The *P* values versus BA.2  
 640 (**a**), BA.5 (**b**), or XBB (**c**) are indicated in the panels.  
 641 For the BA.2 derivatives (**a and b**), statistically significant differences (*P* < 0.05)  
 642 versus BA.2 are indicated with asterisks. Red and blue asterisks, respectively,  
 643 indicate decreased and increased NT<sub>50</sub>s.  
 644 The horizontal dashed line indicates the detection limit (120-fold). Information on  
 645 the convalescent donors is summarized in **Supplementary Table 4**.

### 647 **Fig. 3. Virological characteristics of XBB *in vitro***

648 **a**, Binding affinity of the RBD of SARS-CoV-2 S protein to ACE2 by yeast  
 649 surface display. The K<sub>D</sub> value indicating the binding affinity of the RBD of the  
 650 SARS-CoV-2 S protein to soluble ACE2 when expressed on yeast is shown.  
 651 **b**, Pseudovirus assay. HOS-ACE2-TMPRSS2 cells were infected with  
 652 pseudoviruses bearing each S protein. The amount of input virus was  
 653 normalized based on the amount of HIV-1 p24 capsid protein. The percent  
 654 infectivity compared to that of the virus pseudotyped with the BA.2 S protein are  
 655 shown.  
 656 **c**, Fold increase in pseudovirus infectivity based on TMPRSS2 expression.  
 657 **d,e**, S-based fusion assay. **d**, S protein expression on the cell surface. The  
 658 summarized data are shown. **e**, S-based fusion assay in Calu-3 cells. The  
 659 recorded fusion activity (arbitrary units) is shown. The dashed green line  
 660 indicates the result of BA.2. The red number in each panel indicates the fold  
 661 difference between BA.2 and the derivative tested (XBB in the top left panel) at  
 662 24 h post coculture.  
 663 **f–m**, Growth kinetics of XBB. Clinical isolates of BA.2, BA.2.75, XBB and Delta  
 664 (only in **i,m**) were inoculated into Vero cells (**f**), VeroE6/TMPRSS2 cells (**g**),  
 665 Calu-3 cells (**h**), AO-ALI (**i**), iPSC-derived airway epithelial cells (**j**), iPSC-derived  
 666 lung epithelial cells (**k**) and an airway-on-a-chip system (**l**). The copy numbers of  
 667 viral RNA in the culture supernatant (**f–h**), the apical sides of cultures (**i–k**), and

the top (**l, left**) and bottom (**l, right**) channels of an airway-on-a-chip were routinely quantified by RT-qPCR. In **m**, the percentage of viral RNA load in the bottom channel per top channel at 6 d.p.i. (i.e., % invaded virus from the top channel to the bottom channel) is shown. Assays were performed in triplicate (**a,l,m**) or quadruplicate (**b-k**). The presented data are expressed as the average  $\pm$  SD (**a-e**) or SEM (**f-m**). In **a-d,m**, each dot indicates the result of an individual replicate. In **a-d**, the dashed horizontal lines indicate the value of BA.2. In **a-d**, statistically significant differences (\*,  $P < 0.05$ ) versus BA.2 were determined by two-sided Student's *t* tests. Red and blue asterisks, respectively, indicate increased and decreased values. In **e-l**, statistically significant differences versus BA.2.75 (**e-k**) or XBB (**l**) across timepoints were determined by multiple regression. In **m**, statistically significant differences versus XBB were determined by two-sided Student's *t* tests. The FWERs calculated using the Holm method (**e-l**) or *P* values (**m**) are indicated in the figures.

#### **Fig. 4. Virological characteristics of XBB *in vivo***

Syrian hamsters were intranasally inoculated with BA.2.75, XBB and Delta. Six hamsters of the same age were intranasally inoculated with saline (uninfected). Six hamsters per group were used to routinely measure the respective parameters (**a**). Four hamsters per group were euthanized at 2 and 5 d.p.i. and used for virological and pathological analysis (**b-e**).

**a**, Body weight, Penh, and Rpef values of infected hamsters ( $n = 6$  per infection group).

**b**, (Left) Viral RNA loads in the oral swab ( $n=6$  per infection group). (Middle and right) Viral RNA loads in the lung hilum (middle) and lung periphery (right) of infected hamsters ( $n=4$  per infection group).

**c**, IHC of the viral N protein in the lungs at 2 d.p.i. (top) and 5 d.p.i. (bottom) of infected hamsters. Representative figures (left, N-positive cells are shown in brown) and the percentage of N-positive cells in whole lung lobes (right,  $n=4$  per infection group) are shown. The raw data are shown in **Extended Data Fig. 3**.

**d,e**, H&E staining of the lungs of infected hamsters. Representative figures are shown in **d**. Uninfected lung alveolar space and bronchioles are also shown. **e**, Histopathological scoring of lung lesions ( $n=4$  per infection group). Representative pathological features are reported in our previous studies<sup>2,5,10,23,25,26</sup>.

In **a-c**, data are presented as the average  $\pm$  SEM.

In **a,b,c,e**, statistically significant differences between XBB and other variants across timepoints were determined by multiple regression. In **a**, the 0 d.p.i. data were excluded from the analyses. The FWERs calculated using the Holm method are indicated in the figures.



709 Scale bars, 500  $\mu\text{m}$  (c); 200  $\mu\text{m}$  (d).

710

711 **Supplementary Table 1.** Estimated relative  $R_e$  values of XBB-related lineages  
712 in India

713

714 **Supplementary Table 2.** Estimated lineage frequencies for BQ.1, XBB other  
715 lineages as of November 15, 2022 in each country

716

717 **Supplementary Table 3.** Estimated relative  $R_e$  values of viral lineages by a  
718 hierarchical Bayesian model

719

720 **Supplementary Tables 4.** Human sera used in this study

721

722 **Supplementary Table 5.** Primers used for the construction of SARS-CoV-2 S  
723 expression plasmids

724

725 **Supplementary Table 6.** Summary of unexpected amino acid mutations  
726 detected in the working virus stocks

727

728 **Extended Data Fig. 1. Phylogenetic and epidemic analyses of the XBB**  
729 **lineage**

730 **a,** Ancestral state reconstruction of the circulated regions of viruses, related to  
731 **Fig. 1e.** Unlike **Fig. 1e**, result for the entire of the tree is shown. An asterisk  
732 denotes the MRCA node of XBB lineages.

733 **b,** Relative  $R_e$  values for viral lineages in India, assuming a fixed generation time  
734 of 2.1 days, related to **Fig. 1f.** The  $R_e$  of BA.2 is set at 1. The posterior (violin),  
735 posterior mean (dot), and 95% Bayesian CI (line) are shown.

736 **c,** Relative  $R_e$  values for viral lineages, assuming a fixed generation time of 2.1  
737 days, related to **Fig. 1h.** The  $R_e$  value of BA.5 is set at 1. The posterior (violin),  
738 posterior mean (dot), and 95% Bayesian CI (line) are shown.  $R_e$  values for each  
739 country where BQ.1 and XBB lineages cocirculated are shown.

740

741 **Extended Data Fig. 2. Fusogenicity of BA.2.75 S**

742 **a,b,** S-based fusion assay. **a,** S protein expression on the cell surface. The  
743 summarized data are shown. **b,** S-based fusion assay in Calu-3 cells. The  
744 recorded fusion activity (arbitrary units) is shown. The dashed green line  
745 indicates the result of BA.2. The red number in each panel indicates the fold  
746 difference between BA.2 and the derivative tested (XBB in the top left panel) at  
747 24 h post coculture.

748 Assays were performed in triplicate. The presented data are expressed as the  
749 average  $\pm$  SD. In **a**, each dot indicates the result of an individual replicate, and

the dashed horizontal lines indicate the value of BA.2. Statistically significant differences (\*,  $P < 0.05$ ) versus BA.2 were determined by two-sided Student's  $t$  tests, and red asterisks indicate increased values. In **b**, statistically significant differences versus BA.2 across timepoints were determined by multiple regression. The FWERs calculated using the Holm method are indicated in the figures.

756

### 757 **Extended Data Fig. 3. Histological observations in infected hamsters**

758 IHC of the SARS-CoV-2 N protein in the lungs of infected hamsters at 2 d.p.i. (**a**)  
 759 and 5 d.p.i. (**b**) (4 hamsters per infection group). In each panel, IHC staining (top)  
 760 and the digitalized N-positive area (bottom, indicated in red) are shown. The red  
 761 numbers in the bottom panels indicate the percentage of the N-positive area.  
 762 Summarized data are shown in **Fig. 4c, right**. Scale bars, 5 mm.

## 763 **Methods**

764

## 765 **Ethics statement**

766 All experiments with hamsters were performed in accordance with the Science  
767 Council of Japan's Guidelines for the Proper Conduct of Animal Experiments.  
768 The protocols were approved by the Institutional Animal Care and Use  
769 Committee of National University Corporation Hokkaido University (approval ID:  
770 20-0123 and 20-0060). All protocols involving specimens from human subjects  
771 recruited at Interpark Kuramochi Clinic was reviewed and approved by the  
772 Institutional Review Board of Interpark Kuramochi Clinic (approval ID:  
773 G2021-004). All human subjects provided written informed consent. All protocols  
774 for the use of human specimens were reviewed and approved by the Institutional  
775 Review Boards of The Institute of Medical Science, The University of Tokyo  
776 (approval IDs: 2021-1-0416 and 2021-18-0617) and University of Miyazaki  
777 (approval ID: O-1021).

778

## 779 **Human serum collection**

780 Convalescent sera were collected from fully vaccinated individuals who had  
781 been infected with BA.2 (9 2-dose vaccinated and 5 3-dose vaccinated; 11–61  
782 days after testing. n=14 in total; average age: 47 years, range: 24–84 years,  
783 64% male) (**Fig. 2a**), and fully vaccinated individuals who had been infected with  
784 BA.5 (2 2-dose vaccinated, 17 3-dose vaccinated and 1 4-dose vaccinated;  
785 10–23 days after testing. n=20 in total; average age: 51 years, range: 25–73  
786 years, 45% male) (**Fig. 2b**). The SARS-CoV-2 variants were identified as  
787 previously described<sup>5,10,23</sup>. Sera were inactivated at 56°C for 30 minutes and  
788 stored at –80°C until use. The details of the convalescent sera are summarized  
789 in **Supplementary Table 4**.

790

## 791 **Cell culture**

792 HEK293T cells (a human embryonic kidney cell line; ATCC, CRL-3216),  
793 HEK293 cells (a human embryonic kidney cell line; ATCC, CRL-1573) and  
794 HOS-ACE2/TMPRSS2 cells (HOS cells stably expressing human ACE2 and  
795 TMPRSS2)<sup>35,36</sup> were maintained in DMEM (high glucose) (Sigma-Aldrich, Cat#  
796 6429-500ML) containing 10% fetal bovine serum (FBS, Sigma-Aldrich Cat#  
797 172012-500ML) and 1% penicillin–streptomycin (PS) (Sigma-Aldrich, Cat#  
798 P4333-100ML). HEK293-ACE2 cells (HEK293 cells stably expressing human  
799 ACE2)<sup>24</sup> were maintained in DMEM (high glucose) containing 10% FBS, 1 µg/ml  
800 puromycin (InvivoGen, Cat# ant-pr-1) and 1% PS. HEK293-ACE2/TMPRSS2  
801 cells (HEK293 cells stably expressing human ACE2 and TMPRSS2)<sup>24</sup> were  
802 maintained in DMEM (high glucose) containing 10% FBS, 1 µg/ml puromycin,  
803 200 µg/ml hygromycin (Nacalai Tesque, Cat# 09287-84) and 1% PS. Vero cells

[an African green monkey (*Chlorocebus sabaeus*) kidney cell line; JCRB Cell Bank, JCRB0111] were maintained in Eagle's minimum essential medium (EMEM) (Sigma-Aldrich, Cat# M4655-500ML) containing 10% FBS and 1% PS. VeroE6/TMPRSS2 cells (VeroE6 cells stably expressing human TMPRSS2; JCRB Cell Bank, JCRB1819)<sup>37</sup> were maintained in DMEM (low glucose) (Wako, Cat# 041-29775) containing 10% FBS, G418 (1 mg/ml; Nacalai Tesque, Cat# G8168-10ML) and 1% PS. Calu-3 cells (ATCC, HTB-55) were maintained in Eagle's minimum essential medium (EMEM) (Sigma-Aldrich, Cat# M4655-500ML) containing 10% FBS and 1% PS. Calu-3/DSP<sub>1-7</sub> cells (Calu-3 cells stably expressing DSP<sub>1-7</sub>)<sup>38</sup> were maintained in EMEM (Wako, Cat# 056-08385) containing 20% FBS and 1% PS. Human airway and lung epithelial cells derived from human induced pluripotent stem cells (iPSCs) were manufactured according to established protocols as described below (see "Preparation of human airway and lung epithelial cells from human iPSCs" section) and provided by HiLung Inc. AO-ALI model was generated according to established protocols as described below (see "AO-ALI model" section).

820

## 821 **Viral genome sequencing**

822 Viral genome sequencing was performed as previously described<sup>5</sup>. Briefly, the  
823 virus sequences were verified by viral RNA-sequencing analysis. Viral RNA was  
824 extracted using a QIAamp viral RNA mini kit (Qiagen, Cat# 52906). The  
825 sequencing library employed for total RNA sequencing was prepared using the  
826 NEBNext Ultra RNA Library Prep Kit for Illumina (New England Biolabs, Cat#  
827 E7530). Paired-end 76-bp sequencing was performed using a MiSeq system  
828 (Illumina) with MiSeq reagent kit v3 (Illumina, Cat# MS-102-3001). Sequencing  
829 reads were trimmed using fastp v0.21.0 (ref.<sup>39</sup>) and subsequently mapped to the  
830 viral genome sequences of a lineage B isolate (strain Wuhan-Hu-1; GenBank  
831 accession number: NC\_045512.2)<sup>37</sup> using BWA-MEM v0.7.17 (ref.<sup>40</sup>). Variant  
832 calling, filtering, and annotation were performed using SAMtools v1.9 (ref.<sup>41</sup>) and  
833 snpEff v5.0e<sup>42</sup>.

834

## 835 **Recombination analysis**

836 As of October 3, 2022, we retrieved a total of 562 sequences satisfying the  
837 following criteria from the GISAID database (<https://gisaid.org/>): i) human hosts,  
838 ii) collected after 2022, iii) with length greater than 28,000 base pairs, and iv)  
839 with PANGO lineage designation BJ.1, BM.1, XBB and all their descendants. To  
840 ensure that PANGO lineage definitions in our dataset's metadata included the  
841 latest circulating lineages, the GISAID metadata were downloaded again on  
842 October 15, 2022, and the PANGO lineages of our sequences were updated  
843 accordingly. Sequences were aligned to the reference Wuhan-Hu-1 genome  
844 (GenBank Accession no. NC\_045512.2) and then converted to a multiple

sequence alignment using the 'global\_profile\_alignment.sh' script from the SARS-CoV-2 global phylogeny pipeline<sup>43</sup>, utilizing MAFFT<sup>44</sup>. A number of recombination detection methods were performed on the resulting alignment using the Recombination Detection Program (RDP) v.5.21 (ref.<sup>19</sup>), specifically: RDP<sup>45</sup>, GENECONV<sup>46</sup>, Chimaera<sup>47</sup>, MaxChi<sup>48</sup>, 3seq<sup>49</sup>, BootScan<sup>50</sup> and SiScan<sup>51</sup>. Sequences were assumed to be linear, only recombination events detected consistently by more than 3 independent methods were retrieved and potential false positives were excluded from the final output of RDP5.

## Phylogenetic analyses

To reconstruct the overall relatedness of the XBB parent lineages BJ.1 and BM.1.1.1 to the other Omicron variants (**Fig. 1a**) we retrieved 100 random sequences from each Omicron PANGO lineages: BA.1, BA.2, BA.4 and BA.5 and 20 random sequences from each younger lineage: BQ.1.1, BA.2.75, BJ.1, and BM.1.1.1. Sequence EPI\_ISL\_466615 was also added as an outgroup, representing the oldest isolate of B.1.1 obtained in the UK. The sequences were aligned to the reference Wuhan-Hu-1 genome (NC\_045512.2) and then converted to a multiple sequence alignment using the 'global\_profile\_alignment.sh' script from the SARS-CoV-2 global phylogeny pipeline<sup>43</sup> utilizing MAFFT<sup>44</sup>. Fasttree v.2.1 (ref.<sup>52</sup>) was used to infer the phylogeny for the nucleotide alignment under a GTR substitution model (option -gtr).

For inferring the phylogenies of each non-recombinant segment of the XBB variant, we first split the alignment used for the recombination analysis above at genome position 22,920 (the breakpoint inferred by RDP5). Due to the lack of many informative sites of the 3' end shorter non-recombinant alignment, two quality filtering steps were implemented: i) the 3' end of the alignment was trimmed up to the position where none of the sequences had 3' end gaps and ii) all sequences with Ns were removed, leading to a reduced alignment of 370 sequences. BA.2 sequence EPI\_ISL\_10926749 was added to the alignments as an outgroup. Iqtree2 v2.1.3 (ref.<sup>53</sup>) was used for making a phylogenetic for each non-recombinant alignment. The TIM2+F+I substitution model was used for both trees as selected by the '-m TEST' of iqtree and node support was assessed by performing 1000 ultrafast bootstrap replicates.

Both phylogenies were manually inspected for the presence of temporal signal using TempEst v1.5.3 (ref.<sup>54</sup>). The 3' end non-recombinant segment's phylogeny did not have enough substitutions for a root-to-tip regression to be inferred, hence we proceeded with tip-dating analysis only for the 5' end, longer segment. The 5' end phylogeny was manually rooted to the BA.2 outgroup branch with FigTree [<https://github.com/rambaut/figtree/>] and TreeTime v.0.8.1 (ref.<sup>55</sup>) was used for the time-calibration (maintaining the rooting with the

–keep-root option). The substitution rate inferred by the root-to-tip regression and used for the tree calibration was 1.10E-3 substitutions per site per year, consistent with the accepted rate for SARS-CoV-2 (ref.<sup>56</sup>). Two terminal branches with dates not matching the root-to-tip regression were manually removed from the phylogeny.

To infer the emergence region of XBB, we performed a discrete ancestral state reconstruction analysis utilizing a Markov model. In this analysis, the time-calibrated phylogenetic tree of the 5' non-recombinant segment (1–22,920) (shown in **Fig. 1d, left**) was used. First, based on the sampled (or circulating) region of each virus in the tree, we defined the discrete state of the circulating region for each viral sequence according to the following rules: For samples from India, Bangladesh, and Singapore, the states “India”, “Bangladesh”, and “Singapore” were assigned respectively. For samples from the other Asian countries, “Other Asian countries” was assigned. For samples from European and Northern American countries, “European countries” and “Northern American countries” were assigned, respectively. For samples from the other regions, “Other regions” was assigned. We subsequently inferred the ancestral likelihoods of the seven states (i.e., circulating regions) for each internal node of the tree using the `asr_mk_model` function in the `castor` package<sup>57</sup>. In the tree shown in **Fig. 1e and Extended Data Fig. 1b**, we mapped the ancestral likelihood of the state “India” to the tree. The analyses above were performed on R v.4.2.1.

## Epidemic dynamics analyses

We modeled the epidemic dynamics of viral lineages based on the viral genomic surveillance data deposited in the GISAID database (<https://www.gisaid.org/>). In the present study, we performed three types of analyses: i) The estimation of the relative  $R_e$  for lineages related to XBB in India (shown in **Fig. 1f and Extended Data Fig. 1c**), ii) The estimation of the epidemic frequencies of XBB and BQ.1 lineages in each country as of November 15, 2022 (shown in **Fig. 1g**), and iii) The estimation of the global and country-specific  $R_e$  value of XBB and BQ.1 lineages in the countries where these variants circulated (**Fig. 1h,i and Extended Data Fig. 1d**). For the three analyses, the metadata of viral sequences downloaded from the GISAID database on December 1<sup>st</sup>, 2022 was used. We excluded the sequence records with the following features: i) a lack of collection date information; ii) sampling in animals other than humans; iii) sampling by quarantine; or iv) without the PANGO lineage information.

To estimate the relative  $R_e$  for lineages related to XBB in India, we analyzed the records for samples from India from June 1, 2022 to November 15, 2022. We removed records with >5% undetermined (N) nucleotide sequences from the dataset. We first simplified the viral lineage classification based on the



PANGO lineage. We renamed the sublineages of BA.5 as BA.5, and subsequently, we removed the BA.5 sequences harboring any of the convergent S substitutions, S:R346X, S:K444X, and S:N460X from our dataset in order to exclude the sequences belonging to the recent BA.5 sublineages exhibiting particularly higher  $R_e$  such as BQ.1.1 (ref.<sup>2</sup>). Also, we removed the sequences of BA.2.75 harboring any of the convergent S substitutions, S:R346X, S:K444X, S:N460X, and S:F486X. Furthermore, since a part of BA.2.10.1 sequences harbor XBB-characteristic substitutions (S:V83A, S:F486S, and S:F490S) probably due to the misclassification of XBB, we removed the sequences of BA.2.10.1 harboring these XBB-characteristic substitutions. According to the modified viral lineages, we extracted records for viral lineages of interest: BA.2, BA.5, BA.2.75, BM.1, BM1.1, BM.1.1.1, BA.2.10, BJ.1, XBB, and XBB.1. Subsequently, we counted the daily frequency of each viral lineage. Relative  $R_e$  value for each viral lineage was estimated according to the Bayesian multinomial logistic model, described in our previous study<sup>5</sup>. Briefly, we estimated the logistic slope parameter  $\beta_l$  for each viral lineage using the model and then calculated relative  $R_e$  for each lineage  $r_l$  as  $r_l = \exp(\gamma\beta_l)$  where  $\gamma$  is the average viral generation time (2.1 days) ([http://sonorouschocolate.com/covid19/index.php?title=Estimating\\_Generation\\_Time\\_Of\\_Omicron](http://sonorouschocolate.com/covid19/index.php?title=Estimating_Generation_Time_Of_Omicron)). Parameter estimation was performed via the MCMC approach implemented in CmdStan v2.30.1 (<https://mc-stan.org>) with CmdStanr v0.5.3 (<https://mc-stan.org/cmdstanr/>). Four independent MCMC chains were run with 500 and 1,000 steps in the warmup and sampling iterations, respectively. We confirmed that all estimated parameters showed <1.01 R-hat convergence diagnostic values and >200 effective sampling size values, indicating that the MCMC runs were successfully convergent. Information on the estimated parameters is summarized in **Supplementary Table 1**.

To estimate the epidemic frequencies of XBB and BQ.1 lineages in each country as of November 15, 2022, we analyzed the records for viral samples collected from August 1, 2022 to November 15<sup>th</sup>, 2022. In data for each country, we counted the daily lineage frequency of BQ.1 (including its decedent sublineages), XBB (including its decedent sublineages), and the other SARS-CoV-2 lineages (referred to as “Other lineages”). We analyzed the data only for countries with a total of  $\geq 1000$  samples or  $\geq 50$  samples of either the BQ.1 or XBB lineages. In this criterion, 56 countries remained. Subsequently, we fitted the multinomial logistic model described in the paragraph above to the daily lineage frequency data of each country separately, and the epidemic frequency of each viral lineage as of November 15, 2022 in each country was estimated. If the data for November 15, 2022 in a particular country are not available, the lineage frequencies at the latest date in the country were used instead. The estimated lineage frequencies for BQ.1 and XBB in each country

were shown on the global map using The R library maps v3.4.1 (<https://cran.r-project.org/web/packages/maps/index.html>). Information on the estimated lineage frequencies is summarized in **Supplementary Table 2**.

To estimate the global average and country-specific  $R_e$  values for BQ.1 and XBB lineages, we analyzed the sequence records for viral samples collected from August 1, 2022 to November 15, 2022. We defined the sequences of BQ.1 (including its sublineages) harboring S:R346T as BQ.1.1 and the other BQ.1 sequences as BQ.1. Similarly, the sequences of XBB (including its sublineages) harboring S:G252V as XBB and the other XBB sequences as XBB. Subsequently, we extracted the sequence records of BQ.1, BQ.1.1, XBB, and XBB.1 in addition to BA.5 (including its sublineages) and BA.2.75 (including its sublineages), which are predominant lineages before the BQ.1 and XBB emergencies. Next, we counted the daily frequency of the lineages above in each country. We analyzed counties with a total of  $\geq 1000$  samples and  $\geq 200$  samples of either the BQ.1, BQ.1.1, XBB, or XBB.1 lineages. In this criterion, 11 countries (Australia, Austria, Denmark, India, Indonesia, Israel, Malaysia, Peru, Singapore, the UK, and the USA) remained. To estimate the global average  $R_e$  values of the lineages above, we employed a hierarchal Bayesian multinomial logistic model, which we established in our previous studies<sup>10,23</sup>. Briefly, this hierarchal model can estimate the global average and country-specific  $R_e$  values of lineages of interest simultaneously according to the daily lineage frequency data from multiple countries. The relative  $R_e$  of each viral lineage  $l$  in each county  $s$  ( $r_{ls}$ ) was calculated according to the country-specific slope parameter,  $\beta_{ls}$ , as  $r_{ls} = \exp(\gamma\beta_{ls})$  where  $\gamma$  is the average viral generation time (2.1 days). Similarly, the global average relative  $R_e$  of each viral lineage was calculated according to the global average slope parameter,  $\beta_l$ , as  $r_l = \exp(\gamma\beta_l)$ . For parameter estimation, the global average intercept and slope parameters of the BA.5 variant were fixed at 0. Consequently, the relative  $R_e$  of BA.5 was fixed at 1, and those of the other lineages were estimated relative to that of BA.5. Parameter estimation was performed via the MCMC approach implemented in CmdStan v2.30.1 (<https://mc-stan.org>) with CmdStanr v0.5.3 (<https://mc-stan.org/cmdstanr/>). Four independent MCMC chains were run with 500 and 2,000 steps in the warmup and sampling iterations, respectively. We confirmed that all estimated parameters showed  $<1.01$  R-hat convergence diagnostic values and  $>200$  effective sampling size values, indicating that the MCMC runs were successfully convergent. Information on the estimated parameters is summarized in **Supplementary Table 3**.

## Plasmid construction

Plasmids expressing the codon-optimized SARS-CoV-2 S proteins of B.1.1 (the parental D614G-bearing variant), BA.2 and BA.5, BQ.1.1 and BA.2.75 were

prepared in our previous studies<sup>2,5,10,23,24,58</sup>. Plasmids expressing the codon-optimized S proteins of XBB and BA.2 S-based derivatives were generated by site-directed overlap extension PCR using the primers listed in **Supplementary Table 5**. The resulting PCR fragment was digested with KpnI (New England Biolabs, Cat# R0142S) and NotI (New England Biolabs, Cat# R1089S) and inserted into the corresponding site of the pCAGGS vector<sup>59</sup>. Nucleotide sequences were determined by DNA sequencing services (Eurofins), and the sequence data were analyzed by Sequencher v5.1 software (Gene Codes Corporation).

### Neutralization assay

Pseudoviruses were prepared as previously described<sup>2,5,10,23,26,28,31,32,36,38,58,60</sup>. Briefly, lentivirus (HIV-1)-based, luciferase-expressing reporter viruses were pseudotyped with SARS-CoV-2 S proteins. HEK293T cells (1,000,000 cells) were cotransfected with 1 µg psPAX2-IN/HiBiT<sup>35</sup>, 1 µg pWPI-Luc2<sup>35</sup>, and 500 ng plasmids expressing parental S or its derivatives using PEI Max (Polysciences, Cat# 24765-1) according to the manufacturer's protocol. Two days posttransfection, the culture supernatants were harvested and centrifuged. The pseudoviruses were stored at -80°C until use.

The neutralization assay (**Fig. 2**) was prepared as previously described<sup>2,5,10,23,26,28,31,32,36,38,58,60</sup>. Briefly, the SARS-CoV-2 S pseudoviruses (counting ~20,000 relative light units) were incubated with serially diluted (120-fold to 87,480-fold dilution at the final concentration) heat-inactivated sera at 37°C for 1 hour. Pseudoviruses without sera were included as controls. Then, a 40 µl mixture of pseudovirus and serum/antibody was added to HOS-ACE2/TMPRSS2 cells (10,000 cells/50 µl) in a 96-well white plate. At 2 d.p.i., the infected cells were lysed with a One-Glo luciferase assay system (Promega, Cat# E6130), a Bright-Glo luciferase assay system (Promega, Cat# E2650), or a britelite plus Reporter Gene Assay System (PerkinElmer, Cat# 6111 6066769), and the luminescent signal was measured using a GloMax explorer multimode microplate reader 3500 (Promega) or CentroXS3 (Berthold Technologies). The assay of each serum sample was performed in triplicate, and the 50% neutralization titer (NT<sub>50</sub>) was calculated using Prism 9 software v9.1.1 (GraphPad Software).

### SARS-CoV-2 preparation and titration

The working virus stocks of SARS-CoV-2 were prepared and titrated as previously described<sup>2,5,10,23-26,28,30,61</sup>. In this study, clinical isolates of B.1.1 (strain TKYE610670; GISAID ID: EPI\_ISL\_479681)<sup>25</sup>, Delta (B.1.617.2, strain TKYTK1734; GISAID ID: EPI\_ISL\_2378732)<sup>26</sup>, BA.2 (strain TY40-385; GISAID ID: EPI\_ISL\_9595859)<sup>5</sup>, BA.5 (strain TKYS14631; GISAID ID:

1050 EPI\_ISL\_12812500)<sup>10,30</sup>, BA.2.75 (strain TY41-716; GISAID ID:  
1051 EPI\_ISL\_13969765)<sup>10</sup> and XBB (strain TY41-795; GISAID ID:  
1052 EPI\_ISL\_15669344) were used. In brief, 20 µl of the seed virus was inoculated  
1053 into VeroE6/TMPRSS2 cells (5,000,000 cells in a T-75 flask). One h.p.i., the  
1054 culture medium was replaced with DMEM (low glucose) (Wako, Cat#  
1055 041-29775) containing 2% FBS and 1% PS. At 3 d.p.i., the culture medium was  
1056 harvested and centrifuged, and the supernatants were collected as the working  
1057 virus stock.

1058 The titer of the prepared working virus was measured as the 50%  
1059 tissue culture infectious dose (TCID<sub>50</sub>). Briefly, one day before infection,  
1060 VeroE6/TMPRSS2 cells (10,000 cells) were seeded into a 96-well plate. Serially  
1061 diluted virus stocks were inoculated into the cells and incubated at 37°C for 4  
1062 days. The cells were observed under a microscope to judge the CPE  
1063 appearance. The value of TCID<sub>50</sub>/ml was calculated with the Reed–Muench  
1064 method<sup>62</sup>.

1065 For verification of the sequences of SARS-CoV-2 working viruses, viral  
1066 RNA was extracted from the working viruses using a QIAamp viral RNA mini kit  
1067 (Qiagen, Cat# 52906) and viral genome sequences were analyzed as described  
1068 above (see "Viral genome sequencing" section). Information on the unexpected  
1069 substitutions detected is summarized in **Supplementary Table S6**, and the raw  
1070 data are deposited in the Sequence Read Archive (accession ID: PRJDB14899).

1071

## 1072 **Yeast surface display**

1073 Yeast surface display (**Fig. 3a**) was performed as previously described<sup>2,10,21,22</sup>.  
1074 Briefly, the RBD genes ["construct 3" in ref.<sup>22</sup>, covering residues 330–528] in the  
1075 pJYDC1 plasmid were cloned by restriction enzyme-free cloning and  
1076 transformed into the EBY100 *Saccharomyces cerevisiae*. The primers are listed  
1077 in **Supplementary Table S5**. The expression media 1/9 (ref.<sup>63</sup>) was inoculated  
1078 (OD 1) by overnight (220 rpm, 30°C, SD-CAA media) grown culture, followed by  
1079 cultivation for 24 hours at 20°C. The medium was supplemented with 10 mM  
1080 DMSO solubilized bilirubin (Sigma-Aldrich, Cat# 14370-1G) for expression  
1081 cocultivation labeling [pJYDC1, eUnaG2 reporter holo-form formation,  
1082 green/yellow fluorescence (excitation at 498 nm, emission at 527 nm)]. Cells  
1083 (100 µl aliquots) were collected by centrifugation (3000 g, 3 minutes), washed in  
1084 ice-cold PBSB buffer (PBS with 1 mg/ml BSA), and resuspended in an analysis  
1085 solution with a series of CF®640R succinimidyl ester labeled (Biotium, Cat#  
1086 92108) ACE2 peptidase domain (residues 18–740) concentrations. The  
1087 peptidase domain of wild-type ACE2 and ACE2 N90Q were produced and  
1088 purified as previously described<sup>22</sup>. The reaction volume was adjusted (1–100 ml)  
1089 to avoid the ligand depletion effect, and the suspension was incubated overnight  
1090 in a rotator shaker (10 rpm, 4°C). Incubated samples were washed with PBSB

1091 buffer, transferred into a 96-well plate (Thermo Fisher Scientific, Cat# 268200),  
1092 and analyzed by a CytoFLEX S Flow Cytometer (Beckman Coulter, USA, Cat#.  
1093 N0-V4-B2-Y4) with the gating strategy described previously<sup>22</sup>. The eUnaG2  
1094 signals were compensated by CytExpert software (Beckman Coulter). The mean  
1095 binding signal (FL4-A) values of RBD-expressing cells, subtracted by signals of  
1096 nonexpressing populations, were subjected to the determination of the  
1097 dissociation constant  $K_D$ ,  $Y_D$  by a noncooperative Hill equation fitted by nonlinear  
1098 least-squares regression using Python v3.7 fitted together with two additional  
1099 parameters describing the titration curve<sup>22</sup>.

1100

### 1101 **Pseudovirus infection**

1102 Pseudovirus infection (**Fig. 3b**) was performed as previously  
1103 described<sup>2,5,10,23,26,28,31,32,36,38,58,60</sup>. Briefly, the amount of pseudoviruses prepared  
1104 was quantified by the HiBiT assay using a Nano Glo HiBiT lytic detection system  
1105 (Promega, Cat# N3040) as previously described<sup>35,64</sup>. For measurement of  
1106 pseudovirus infectivity, the same amount of pseudoviruses (normalized to the  
1107 HiBiT value, which indicates the amount of HIV-1 p24 antigen) was inoculated  
1108 into HOS-ACE2/TMPRSS2 cells, HEK293-ACE2 cells or  
1109 HEK293-ACE2/TMPRSS2 cells and viral infectivity was measured as described  
1110 above (see “Neutralization assay” section). For analysis of the effect of  
1111 TMPRSS2 on pseudovirus infectivity (**Fig. 3c**), the fold change of the values of  
1112 HEK293-ACE2/TMPRSS2 to HEK293-ACE2 was calculated.

1113

### 1114 **SARS-CoV-2 S-based fusion assay**

1115 A SARS-CoV-2 S-based fusion assay (**Fig. 3d,e**) was performed as previously  
1116 described<sup>2,5,10,23-28</sup>. Briefly, on day 1, effector cells (i.e., S-expressing cells) and  
1117 target cells (Calu-3/DSP<sub>1-7</sub> cells) were prepared at a density of  $0.6\text{--}0.8 \times 10^6$   
1118 cells in a 6-well plate. On day 2, for the preparation of effector cells, HEK293  
1119 cells were cotransfected with the S expression plasmids (400 ng) and pDSP<sub>8-11</sub>  
1120 (ref.<sup>65</sup>) (400 ng) using TransIT-LT1 (Takara, Cat# MIR2300). On day 3 (24 hours  
1121 posttransfection), 16,000 effector cells were detached and reseeded into a  
1122 96-well black plate (PerkinElmer, Cat# 6005225), and target cells were reseeded  
1123 at a density of 1,000,000 cells/2 ml/well in 6-well plates. On day 4 (48 hours  
1124 posttransfection), target cells were incubated with EnduRen live cell substrate  
1125 (Promega, Cat# E6481) for 3 hours and then detached, and 32,000 target cells  
1126 were added to a 96-well plate with effector cells. *Renilla* luciferase activity was  
1127 measured at the indicated time points using Centro XS3 LB960 (Berthold  
1128 Technologies). For measurement of the surface expression level of the S protein,  
1129 effector cells were stained with rabbit anti-SARS-CoV-2 S S1/S2 polyclonal  
1130 antibody (Thermo Fisher Scientific, Cat# PA5-112048, 1:100). Normal rabbit IgG  
1131 (Southern Biotech, Cat# 0111-01, 1:100) was used as a negative control, and



1132 APC-conjugated goat anti-rabbit IgG polyclonal antibody (Jackson  
1133 ImmunoResearch, Cat# 111-136-144, 1:50) was used as a secondary antibody.  
1134 The surface expression level of S proteins (**Fig. 3d**) was measured using a  
1135 FACS Canto II (BD Biosciences) and the data were analyzed using FlowJo  
1136 software v10.7.1 (BD Biosciences). For calculation of fusion activity, *Renilla*  
1137 luciferase activity was normalized to the MFI of surface S proteins. The  
1138 normalized value (i.e., *Renilla* luciferase activity per the surface S MFI) is shown  
1139 as fusion activity.

1140

#### 1141 **AO-ALI model**

1142 An airway organoid (AO) model was generated according to our previous  
1143 report<sup>2,10,29,30</sup>. Briefly, normal human bronchial epithelial cells (NHBEs, Cat#  
1144 CC-2540, Lonza) were used to generate AOs. NHBEs were suspended in 10  
1145 mg/ml cold Matrigel growth factor reduced basement membrane matrix (Corning,  
1146 Cat# 354230). Fifty microliters of cell suspension were solidified on prewarmed  
1147 cell culture-treated multiple dishes (24-well plates; Thermo Fisher Scientific,  
1148 Cat# 142475) at 37°C for 10 min, and then, 500 µl of expansion medium was  
1149 added to each well. AOs were cultured with AO expansion medium for 10 days.  
1150 For maturation of the AOs, expanded AOs were cultured with AO differentiation  
1151 medium for 5 days.

1152 The AO-ALI model (**Fig. 3i**) was generated according to our previous  
1153 report<sup>10,66</sup>. For generation of AO-ALI, expanding AOs were dissociated into  
1154 single cells, and then were seeded into Transwell inserts (Corning, Cat# 3413) in  
1155 a 24-well plate. AO-ALI was cultured with AO differentiation medium for 5 days  
1156 to promote their maturation. AO-ALI was infected with SARS-CoV-2 from the  
1157 apical side.

1158

#### 1159 **Preparation of human airway and lung epithelial cells from human iPSCs**

1160 The air-liquid interface culture of airway and lung epithelial cells (**Fig. 3j,k**) was  
1161 differentiated from human iPSC-derived lung progenitor cells as previously  
1162 described<sup>5,10,30,67-69</sup>. Briefly, lung progenitor cells were induced stepwise from  
1163 human iPSCs according to a 21-day and 4-step protocol<sup>67</sup>. At day 21, lung  
1164 progenitor cells were isolated with the specific surface antigen carboxypeptidase  
1165 M and seeded onto the upper chamber of a 24-well Cell Culture Insert (Falcon,  
1166 #353104), followed by 28-day and 7-day differentiation of airway and lung  
1167 epithelial cells, respectively. Alveolar differentiation medium with  
1168 dexamethasone (Sigma-Aldrich, Cat# D4902), KGF (PeproTech, Cat# 100-19),  
1169 8-Br-cAMP (Biolog, Cat# B007), 3-isobutyl 1-methylxanthine (IBMX) (Fujifilm  
1170 Wako, Cat# 095-03413), CHIR99021 (Axon Medchem, Cat# 1386), and  
1171 SB431542 (Fujifilm Wako, Cat# 198-16543) was used for the induction of lung  
1172 epithelial cells. PneumaCult ALI (STEMCELL Technologies, Cat# ST-05001)



1173 with heparin (Nacalai Tesque, Cat# 17513-96) and Y-27632 (LC Laboratories,  
1174 Cat# Y-5301) hydrocortisone (Sigma-Aldrich, Cat# H0135) was used for  
1175 induction of airway epithelial cells.

1176

### 1177 **Airway-on-a-chips**

1178 Airway-on-a-chips (**Fig. 3l,m**) were prepared as previously described<sup>2,10,29,30</sup>.  
1179 Human lung microvascular endothelial cells (HMVEC-L) were obtained from  
1180 Lonza (Cat# CC-2527) and cultured with EGM-2-MV medium (Lonza, Cat#  
1181 CC-3202). For preparation of the airway-on-a-chip, first, the bottom channel of a  
1182 polydimethylsiloxane (PDMS) device was precoated with fibronectin (3 µg/ml,  
1183 Sigma-Aldrich, Cat# F1141). The microfluidic device was generated according to  
1184 our previous report<sup>70</sup>. HMVEC-L cells were suspended at 5,000,000 cells/ml in  
1185 EGM2-MV medium. Then, 10 µl of suspension medium was injected into the  
1186 fibronectin-coated bottom channel of the PDMS device. Then, the PDMS device  
1187 was turned upside down and incubated. After 1 hour, the device was turned over,  
1188 and the EGM2-MV medium was added into the bottom channel. After 4 days,  
1189 AOs were dissociated and seeded into the top channel. AOs were generated  
1190 according to our previous report<sup>66</sup>. AOs were dissociated into single cells and  
1191 then suspended at 5,000,000 cells/ml in the AO differentiation medium. Ten  
1192 microliter suspension medium was injected into the top channel. After 1 hour, the  
1193 AO differentiation medium was added to the top channel. In the infection  
1194 experiments (**Fig. 3l,m**), the AO differentiation medium containing either BA.2,  
1195 BA.2.75, XBB or Delta isolate (500 TCID<sub>50</sub>) was inoculated into the top channel.  
1196 At 2 h.p.i., the top and bottom channels were washed and cultured with AO  
1197 differentiation and EGM2-MV medium, respectively. The culture supernatants  
1198 were collected, and viral RNA was quantified using RT-qPCR (see “RT-qPCR”  
1199 section above).

1200

### 1201 **Microfluidic device**

1202 A microfluidic device was generated according to our previous report<sup>10,70</sup>. Briefly,  
1203 the microfluidic device consisted of two layers of microchannels separated by a  
1204 semipermeable membrane. The microchannel layers were fabricated from  
1205 PDMS using a soft lithographic method. PDMS prepolymer (Dow Corning, Cat#  
1206 SYLGARD 184) at a base to curing agent ratio of 10:1 was cast against a mold  
1207 composed of SU-8 2150 (MicroChem, Cat# SU-8 2150) patterns formed on a  
1208 silicon wafer. The cross-sectional size of the microchannels was 1 mm in width  
1209 and 330 µm in height. Access holes were punched through the PDMS using a  
1210 6-mm biopsy punch (Kai Corporation, Cat# BP-L60K) to introduce solutions into  
1211 the microchannels. Two PDMS layers were bonded to a PET membrane  
1212 containing 3.0-µm pores (Falcon, Cat# 353091) using a thin layer of liquid PDMS  
1213 prepolymer as the mortar. PDMS prepolymer was spin-coated (4000 rpm for 60

sec) onto a glass slide. Subsequently, both the top and bottom channel layers were placed on the glass slide to transfer the thin layer of PDMS prepolymer onto the embossed PDMS surfaces. The membrane was then placed onto the bottom layer and sandwiched with the top layer. The combined layers were left at room temperature for 1 day to remove air bubbles and then placed in an oven at 60°C overnight to cure the PDMS glue. The PDMS devices were sterilized by placing them under UV light for 1 hour before the cell culture.

1221

## 1222 **SARS-CoV-2 infection**

1223 One day before infection, Vero cells (10,000 cells), VeroE6/TMPRSS2 cells  
1224 (10,000 cells) and Calu-3 cells (10,000 cells) were seeded into a 96-well plate.  
1225 SARS-CoV-2 [1,000 TCID<sub>50</sub> for Vero cells (**Fig. 3f**); 100 TCID<sub>50</sub> for  
1226 VeroE6/TMPRSS2 cells (**Fig. 3g**) and Calu-3 cells (**Fig. 3h**)] was inoculated and  
1227 incubated at 37°C for 1 hour. The infected cells were washed, and 180 µl of  
1228 culture medium was added. The culture supernatant (10 µl) was harvested at the  
1229 indicated timepoints and used for RT-qPCR to quantify the viral RNA copy  
1230 number (see “RT-qPCR” section below). In the infection experiments using  
1231 AO-ALI (**Fig. 3i**), human iPSC-derived airway and lung epithelial cells (**Fig. 3j,k**),  
1232 working viruses were diluted with Opti-MEM (Thermo Fisher Scientific, Cat#  
1233 11058021). The diluted viruses (1,000 TCID<sub>50</sub> in 100 µl) were inoculated onto  
1234 the apical side of the culture and incubated at 37°C for 1 hour. The  
1235 inoculated viruses were removed and washed twice with Opti-MEM. For  
1236 collection of the viruses, 100 µl Opti-MEM was applied onto the apical side of  
1237 the culture and incubated at 37°C for 10 minutes. The Opti-MEM was  
1238 collected and used for RT-qPCR to quantify the viral RNA copy number (see  
1239 “RT-qPCR” section below). The infection experiments using an airway-on-a-chip  
1240 system (**Fig. 3l,m**) were performed as described above (see “Airway-on-a-chips”  
1241 section).

1242

## 1243 **RT-qPCR**

1244 RT-qPCR was performed as previously described<sup>2,5,10,23-26,28,30,61</sup>. Briefly, 5 µl  
1245 culture supernatant was mixed with 5 µl of 2 × RNA lysis buffer [2% Triton X-100  
1246 (Nacalai Tesque, Cat# 35501-15), 50 mM KCl, 100 mM Tris-HCl (pH 7.4), 40%  
1247 glycerol, 0.8 U/µl recombinant RNase inhibitor (Takara, Cat# 2313B)] and  
1248 incubated at room temperature for 10 min. RNase-free water (90 µl) was added,  
1249 and the diluted sample (2.5 µl) was used as the template for real-time RT-PCR  
1250 performed according to the manufacturer’s protocol using One Step TB Green  
1251 PrimeScript PLUS RT-PCR kit (Takara, Cat# RR096A) and the following  
1252 primers: Forward *N*, 5'-AGC CTC TTC TCG TTC CTC ATC AC-3'; and Reverse  
1253 *N*, 5'-CCG CCA TTG CCA GCC ATT C-3'. The viral RNA copy number was  
1254 standardized with a SARS-CoV-2 direct detection RT-qPCR kit (Takara, Cat#

RC300A). Fluorescent signals were acquired using a QuantStudio 1 Real-Time PCR system (Thermo Fisher Scientific), QuantStudio 3 Real-Time PCR system (Thermo Fisher Scientific), QuantStudio 5 Real-Time PCR system (Thermo Fisher Scientific), StepOne Plus Real-Time PCR system (Thermo Fisher Scientific), CFX Connect Real-Time PCR Detection system (Bio-Rad), Eco Real-Time PCR System (Illumina), qTOWER3 G Real-Time System (Analytik Jena), Thermal Cycler Dice Real Time System III (Takara) or 7500 Real-Time PCR System (Thermo Fisher Scientific).

1263

## 1264 **Animal experiments**

Animal experiments (**Fig. 4 and Extended Data Fig. 3**) were performed as previously described<sup>2,5,10,23,25,26,30</sup>. Syrian hamsters (male, 4 weeks old) were purchased from Japan SLC Inc. (Shizuoka, Japan). For the virus infection experiments, hamsters were anesthetized by intramuscular injection of a mixture of 0.15 mg/kg medetomidine hydrochloride (Domitor<sup>®</sup>, Nippon Zenyaku Kogyo), 2.0 mg/kg midazolam (Dormicum<sup>®</sup>, Fujifilm Wako, Cat# 135-13791) and 2.5 mg/kg butorphanol (Vetorphale<sup>®</sup>, Meiji Seika Pharma) or 0.15 mg/kg medetomidine hydrochloride, 4.0 mg/kg alphaxalone (Alfaxan<sup>®</sup>, Jurox) and 2.5 mg/kg butorphanol. Delta, BA.2.75 and XBB (10,000 TCID<sub>50</sub> in 100 µl) or saline (100 µl) was intranasally inoculated under anesthesia. Oral swabs were collected at the indicated timepoints. Body weight was recorded daily by 7 d.p.i. Enhanced pause (Penh), the ratio of time to peak expiratory flow relative to the total expiratory time (Rpef) were measured every day until 7 d.p.i. (see below). Lung tissues were anatomically collected at 2 and 5 d.p.i. The viral RNA load in the oral swabs and respiratory tissues was determined by RT-qPCR. These tissues were also used for IHC and histopathological analyses (see below).

1281

## 1282 **Lung function test**

Lung function tests (**Fig. 4a**) were routinely performed as previously described<sup>2,5,10,23,25,26</sup>. The two respiratory parameters (Penh and Rpef) were measured by using a Buxco Small Animal Whole Body Plethysmography system (DSI) according to the manufacturer's instructions. In brief, a hamster was placed in an unrestrained plethysmography chamber and allowed to acclimatize for 30 seconds. Then, data were acquired over a 2.5-minute period by using FinePointe Station and Review software v2.9.2.12849 (DSI).

1290

## 1291 **Immunohistochemistry**

Immunohistochemistry (IHC) (**Fig. 4c and Extended Data Fig. 3**) was performed as previously described<sup>2,5,10,23,25,26</sup> using an Autostainer Link 48 (Dako). The deparaffinized sections were exposed to EnVision FLEX target retrieval solution high pH (Agilent, Cat# K8004) for 20 minutes at 97°C for

activation, and a mouse anti-SARS-CoV-2 N monoclonal antibody (clone 1035111, R&D Systems, Cat# MAB10474-SP, 1:400) was used as a primary antibody. The sections were sensitized using EnVision FLEX for 15 minutes and visualized by peroxidase-based enzymatic reaction with 3,3'-diaminobenzidine tetrahydrochloride (Dako, Cat# DM827) as substrate for 5 minutes. The N protein positivity was evaluated by certificated pathologists as previously described<sup>2,5,10,23,25,26</sup>. Images were incorporated as virtual slides by NDP.scan software v3.2.4 (Hamamatsu Photonics). The N-protein positivity was measured as the area using Fiji software v2.2.0 (ImageJ).

### H&E staining

H&E staining (**Fig. 4d**) was performed as previously described<sup>2,5,10,23,25,26</sup>. Briefly, excised animal tissues were fixed with 10% formalin neutral buffer solution and processed for paraffin embedding. The paraffin blocks were sectioned at a thickness of 3  $\mu$ m and then mounted on MAS-GP-coated glass slides (Matsunami Glass, Cat# S9901). H&E staining was performed according to a standard protocol.

### Histopathological scoring

Histopathological scoring (**Fig. 4e**) was performed as previously described<sup>2,5,10,23,25,26</sup>. The inflammation area in the infected lungs was measured by the presence of the type II pneumocyte hyperplasia. Four hamsters infected with each virus were sacrificed on days 2 and 5 d.p.i., and all four lung lobes, including right upper (anterior/cranial), middle, lower (posterior/caudal), and accessory lobes, were sectioned along with their bronchi. The tissue sections were stained by H&E, and the digital microscopic images were incorporated into virtual slides using NDRscan3.2 software (Hamamatsu Photonics). The color of the images was decomposed by RGB in split channels using Fiji software v2.2.0.

Histopathological scoring was performed as described in the previous studies<sup>2,5,10,23,25,26</sup>. Pathological features including bronchitis or bronchiolitis, hemorrhage or congestion, alveolar damage with epithelial apoptosis and macrophage infiltration, hyperplasia of type II pneumocytes, and the area of the hyperplasia of large type II pneumocytes were evaluated by certified pathologists and the degree of these pathological findings were arbitrarily scored using four-tiered system as 0 (negative), 1 (weak), 2 (moderate), and 3 (severe). The "large type II pneumocytes" are the hyperplasia of type II pneumocytes exhibiting more than 10- $\mu$ m-diameter nucleus. Total histology score is the sum of these five indices. In the representative lobe of each lung, the inflammation area with type II pneumocytes was gated by the certificated pathologists on H&E staining, and the indicated area were measured by Fiji software v2.2.0.

## 1337 **Statistics and reproducibility**

1338 Statistical significance was tested using a two-sided Mann–Whitney *U* test, a  
1339 two-sided Student's *t* test, a two-sided Welch's *t* test, or a two-sided paired *t*-test  
1340 unless otherwise noted. The tests above were performed using Prism 9 software  
1341 v9.1.1 (GraphPad Software).

1342 In the time-course experiments (**Figures 3e–l, 4a–4c, and 4e, and**  
1343 **S2b**), a multiple regression analysis including experimental conditions (i.e., the  
1344 types of infected viruses) as explanatory variables and timepoints as qualitative  
1345 control variables was performed to evaluate the difference between  
1346 experimental conditions thorough all timepoints. The initial time point was  
1347 removed from the analysis. The *P* value was calculated by a two-sided Wald test.  
1348 Subsequently, familywise error rates (FWERs) were calculated by the Holm  
1349 method. These analyses were performed in R v4.1.2 (<https://www.r-project.org/>).

1350 Principal component analysis to representing the antigenicity of the S  
1351 proteins was performed (**Fig. 2d**). The NT50 values for biological replicates were  
1352 scaled, and subsequently, principal component analysis was performed using  
1353 the prcomp function on R v4.1.2 (<https://www.r-project.org/>).

1354 In **Figures 5D, 5F and S5**, photographs shown are the representative  
1355 areas of at least two independent experiments by using four hamsters at each  
1356 timepoint. In **Figure S4D**, photographs shown are the representatives of >20  
1357 fields of view taken for each sample.

1358

## 1359 **Data availability**

1360 All databases/datasets used in this study are available from the GISAID  
1361 database (<https://www.gisaid.org>) and GenBank database  
1362 (<https://www.gisaid.org>; EPI\_SET ID: EPI\_SET\_221223pb, EPI\_SET\_221223ew,  
1363 EPI\_SET\_221223yk, EPI\_SET\_221222mt). Viral genome sequencing data for  
1364 working viral stocks are available in the Sequence Read Archive (accession ID:  
1365 PRJDB14899).

1366

## 1367 **Code availability**

1368 The computational codes used in the present study and the GISAID  
1369 supplemental tables for EPI\_SET\_221223pb, EPI\_SET\_221223ew,  
1370 EPI\_SET\_221223yk, EPI\_SET\_221222mt are available in the GitHub repository  
1371 (<https://github.com/TheSatoLab/XBB>).



## 1372 References

- 1373 1 WHO. "Tracking SARS-CoV-2 variants (October 28, 2022)"  
1374 <https://www.who.int/en/activities/tracking-SARS-CoV-2-variants>. (2022).
- 1375 2 Ito, J. *et al.* Convergent evolution of the SARS-CoV-2 Omicron  
1376 subvariants leading to the emergence of BQ.1.1 variant. *BioRxiv*, doi:  
1377 <https://doi.org/10.1101/2022.1112.1105.519085> (2022).
- 1378 3 Focosi, D., Quiroga, R., McConnell, S. A., Johnson, M. C. & Casadevall,  
1379 A. Convergent evolution in SARS-CoV-2 Spike creates a variant soup  
1380 that causes new COVID-19 waves. *BioRxiv*, doi:  
1381 <https://doi.org/10.1101/2022.1112.1105.518843> (2022).
- 1382 4 Tuekprakhon, A. *et al.* Antibody escape of SARS-CoV-2 Omicron BA.4  
1383 and BA.5 from vaccine and BA.1 serum. *Cell* **185**, 2422-2433 e2413,  
1384 doi:10.1016/j.cell.2022.06.005 (2022).
- 1385 5 Kimura, I. *et al.* Virological characteristics of the novel SARS-CoV-2  
1386 Omicron variants including BA.4 and BA.5. *Cell* **185**, 3992-4007 e3916  
1387 (2022).
- 1388 6 Makowski, E. K., Schardt, J. S., Smith, M. D. & Tessier, P. M. Mutational  
1389 analysis of SARS-CoV-2 variants of concern reveals key tradeoffs  
1390 between receptor affinity and antibody escape. *PLoS Comput Biol* **18**,  
1391 e1010160, doi:10.1371/journal.pcbi.1010160 (2022).
- 1392 7 Aggarwal, A. *et al.* Mechanistic insights into the effects of key mutations  
1393 on SARS-CoV-2 RBD-ACE2 binding. *Phys Chem Chem Phys* **23**,  
1394 26451-26458, doi:10.1039/d1cp04005g (2021).
- 1395 8 Deshpande, A., Harris, B. D., Martinez-Sobrido, L., Kobie, J. J. & Walter,  
1396 M. R. Epitope Classification and RBD Binding Properties of Neutralizing  
1397 Antibodies Against SARS-CoV-2 Variants of Concern. *Front Immunol* **12**,  
1398 691715, doi:10.3389/fimmu.2021.691715 (2021).
- 1399 9 Chen, J., Wang, R., Wang, M. & Wei, G. W. Mutations Strengthened  
1400 SARS-CoV-2 Infectivity. *J Mol Biol* **432**, 5212-5226,  
1401 doi:10.1016/j.jmb.2020.07.009 (2020).
- 1402 10 Saito, A. *et al.* Virological characteristics of the SARS-CoV-2 Omicron  
1403 BA.2.75 variant. *Cell Host Microbe*, doi:10.1016/j.chom.2022.10.003  
1404 (2022).
- 1405 11 Qu, P. *et al.* Evasion of neutralizing antibody responses by the  
1406 SARS-CoV-2 BA.2.75 variant. *Cell Host Microbe* **30**, 1518-1526 e1514,  
1407 doi:10.1016/j.chom.2022.09.015 (2022).
- 1408 12 Cao, Y. *et al.* Imprinted SARS-CoV-2 humoral immunity induces  
1409 convergent Omicron RBD evolution. *BioRxiv*, doi:  
1410 <https://doi.org/10.1101/2022.1109.1115.507787> (2022).
- 1411 13 Arora, P. *et al.* Omicron sublineage BQ.1.1 resistance to monoclonal  
1412 antibodies. *Lancet Infect Dis*, doi:10.1016/S1473-3099(22)00733-2



- 1413 (2022).
- 1414 14 Wang, Q. *et al.* Antibody evasion by SARS-CoV-2 Omicron subvariants  
1415 BA.2.12.1, BA.4, & BA.5. *Nature*, doi:10.1038/s41586-022-05053-w  
1416 (2022).
- 1417 15 Cao, Y. *et al.* BA.2.12.1, BA.4 and BA.5 escape antibodies elicited by  
1418 Omicron infection. *Nature*, doi:10.1038/s41586-022-04980-y (2022).
- 1419 16 GitHub. "BJ.1/BM.1.1.1 (=BA.2.75.3.1.1.1) recombinant with breakpoint in  
1420 S1 [ $\geq 5$  sequences, 3x Singapore, 2x US as of 2022-09-12] (September  
1421 13, 2022)".  
1422 <https://github.com/cov-lineages/pango-designation/issues/1058>. (2022).
- 1423 17 WHO. "TAG-VE statement on Omicron sublineages BQ.1 and XBB  
1424 (October 27, 2022)"  
1425 [https://www.who.int/news/item/27-10-2022-tag-ve-statement-on-omicron-](https://www.who.int/news/item/27-10-2022-tag-ve-statement-on-omicron-sublineages-bq.1-and-xbb)  
1426 [sublineages-bq.1-and-xbb](https://www.who.int/news/item/27-10-2022-tag-ve-statement-on-omicron-sublineages-bq.1-and-xbb). (2022).
- 1427 18 Wang, Q. *et al.* Antigenic characterization of the SARS-CoV-2 Omicron  
1428 subvariant BA.2.75. *Cell Host Microbe* **30**, 1512-1517 e1514,  
1429 doi:10.1016/j.chom.2022.09.002 (2022).
- 1430 19 Martin, D. P. *et al.* RDP5: a computer program for analyzing  
1431 recombination in, and removing signals of recombination from, nucleotide  
1432 sequence datasets. *Virus Evol* **7**, veaa087, doi:10.1093/ve/veaa087  
1433 (2021).
- 1434 20 GitHub. "BE.1.1.1 sublineage with Orf1b:Y264H and S:N460K ( 69  
1435 sequences ) emerged in Nigeria ( 14 seqs ) (August 26, 2022)".  
1436 <https://github.com/cov-lineages/pango-designation/issues/993>. (2022).
- 1437 21 Dejnirattisai, W. *et al.* SARS-CoV-2 Omicron-B.1.1.529 leads to  
1438 widespread escape from neutralizing antibody responses. *Cell* **185**,  
1439 467-484 e415, doi:10.1016/j.cell.2021.12.046 (2022).
- 1440 22 Zahradnik, J. *et al.* SARS-CoV-2 variant prediction and antiviral drug  
1441 design are enabled by RBD in vitro evolution. *Nat Microbiol* **6**, 1188-1198,  
1442 doi:10.1038/s41564-021-00954-4 (2021).
- 1443 23 Yamasoba, D. *et al.* Virological characteristics of the SARS-CoV-2  
1444 Omicron BA.2 spike. *Cell*, doi:10.1016/j.cell.2022.04.035 (2022).
- 1445 24 Motozono, C. *et al.* SARS-CoV-2 spike L452R variant evades cellular  
1446 immunity and increases infectivity. *Cell Host Microbe* **29**, 1124-1136,  
1447 doi:10.1016/j.chom.2021.06.006 (2021).
- 1448 25 Suzuki, R. *et al.* Attenuated fusogenicity and pathogenicity of  
1449 SARS-CoV-2 Omicron variant. *Nature*, doi:10.1038/s41586-022-04462-1  
1450 (2022).
- 1451 26 Saito, A. *et al.* Enhanced fusogenicity and pathogenicity of SARS-CoV-2  
1452 Delta P681R mutation. *Nature* **602**, 300-306,  
1453 doi:10.1038/s41586-021-04266-9 (2022).

- 1454 27 Nasser, H. *et al.* Monitoring fusion kinetics of viral and target cell  
1455 membranes in living cells using a SARS-CoV-2 spike-protein-mediated  
1456 membrane fusion assay. *STAR Protoc* **3**, 101773,  
1457 doi:10.1016/j.xpro.2022.101773 (2022).
- 1458 28 Kimura, I. *et al.* The SARS-CoV-2 spike S375F mutation characterizes  
1459 the Omicron BA.1 variant. *iScience* **25**, 105720,  
1460 doi:10.1016/j.isci.2022.105720 (2022).
- 1461 29 Hashimoto, R. *et al.* SARS-CoV-2 disrupts the respiratory vascular barrier  
1462 by suppressing Claudin-5 expression. *Sci Adv* **8**, eabo6783, doi:doi:  
1463 10.1126/sciadv.abo6783 (2022).
- 1464 30 Tamura, T. *et al.* Comparative pathogenicity of SARS-CoV-2 Omicron  
1465 subvariants including BA.1, BA.2, and BA.5. *BioRxiv*, doi:  
1466 <https://doi.org/10.1101/2022.1108.1105.502758> (2022).
- 1467 31 Uriu, K. *et al.* Neutralization of the SARS-CoV-2 Mu variant by  
1468 convalescent and vaccine serum. *N Engl J Med* **385**, 2397-2399,  
1469 doi:10.1056/NEJMc2114706 (2021).
- 1470 32 Uriu, K. *et al.* Characterization of the immune resistance of SARS-CoV-2  
1471 Mu variant and the robust immunity induced by Mu infection. *J Infect Dis*,  
1472 doi:10.1093/infdis/jiac053 (2022).
- 1473 33 Cerutti, G. *et al.* Potent SARS-CoV-2 neutralizing antibodies directed  
1474 against spike N-terminal domain target a single supersite. *Cell Host*  
1475 *Microbe* **29**, 819-833 e817, doi:10.1016/j.chom.2021.03.005 (2021).
- 1476 34 Sasaki, A., Lion, S. & Boots, M. Antigenic escape selects for the evolution  
1477 of higher pathogen transmission and virulence. *Nat Ecol Evol* **6**, 51-62,  
1478 doi:10.1038/s41559-021-01603-z (2022).
- 1479 35 Ozono, S. *et al.* SARS-CoV-2 D614G spike mutation increases entry  
1480 efficiency with enhanced ACE2-binding affinity. *Nat Commun* **12**, 848,  
1481 doi:10.1038/s41467-021-21118-2 (2021).
- 1482 36 Ferreira, I. *et al.* SARS-CoV-2 B.1.617 mutations L452R and E484Q are  
1483 not synergistic for antibody evasion. *J Infect Dis* **224**, 989-994,  
1484 doi:10.1093/infdis/jiab368 (2021).
- 1485 37 Matsuyama, S. *et al.* Enhanced isolation of SARS-CoV-2 by  
1486 TMPRSS2-expressing cells. *Proc Natl Acad Sci U S A* **117**, 7001-7003,  
1487 doi:10.1073/pnas.2002589117 (2020).
- 1488 38 Fujita, S. *et al.* Structural Insight into the Resistance of the SARS-CoV-2  
1489 Omicron BA.4 and BA.5 Variants to Cilgavimab. *Viruses* **14**, 2677 (2022).
- 1490 39 Chen, S., Zhou, Y., Chen, Y. & Gu, J. fastp: an ultra-fast all-in-one  
1491 FASTQ preprocessor. *Bioinformatics* **34**, i884-i890,  
1492 doi:10.1093/bioinformatics/bty560 (2018).
- 1493 40 Li, H. & Durbin, R. Fast and accurate short read alignment with  
1494 Burrows-Wheeler transform. *Bioinformatics* **25**, 1754-1760,

doi:10.1093/bioinformatics/btp324 (2009).

41 Li, H. *et al.* The sequence alignment/map format and SAMtools. *Bioinformatics* **25**, 2078-2079, doi:10.1093/bioinformatics/btp352 (2009).

42 Cingolani, P. *et al.* A program for annotating and predicting the effects of single nucleotide polymorphisms, SnpEff: SNPs in the genome of *Drosophila melanogaster* strain w1118; iso-2; iso-3. *Fly (Austin)* **6**, 80-92, doi:10.4161/fly.19695 (2012).

43 Lanfear, R. A global phylogeny of SARS-CoV-2 sequences from GISAID. Zenodo doi: 10.5281/zenodo.3958883. <https://zenodo.org/record/4289383#.Y6ER8C33ITs>. (2020).

44 Katoh, K. & Standley, D. M. MAFFT multiple sequence alignment software version 7: improvements in performance and usability. *Mol Biol Evol* **30**, 772-780, doi:10.1093/molbev/mst010 (2013).

45 Martin, D. & Rybicki, E. RDP: detection of recombination amongst aligned sequences. *Bioinformatics* **16**, 562-563, doi:10.1093/bioinformatics/16.6.562 (2000).

46 Padidam, M., Sawyer, S. & Fauquet, C. M. Possible emergence of new geminiviruses by frequent recombination. *Virology* **265**, 218-225, doi:10.1006/viro.1999.0056 (1999).

47 Posada, D. & Crandall, K. A. Evaluation of methods for detecting recombination from DNA sequences: computer simulations. *Proc Natl Acad Sci U S A* **98**, 13757-13762, doi:10.1073/pnas.241370698 (2001).

48 Smith, J. M. Analyzing the mosaic structure of genes. *J Mol Evol* **34**, 126-129, doi:10.1007/BF00182389 (1992).

49 Boni, M. F., Posada, D. & Feldman, M. W. An exact nonparametric method for inferring mosaic structure in sequence triplets. *Genetics* **176**, 1035-1047, doi:10.1534/genetics.106.068874 (2007).

50 Martin, D. P., Posada, D., Crandall, K. A. & Williamson, C. A modified bootscan algorithm for automated identification of recombinant sequences and recombination breakpoints. *AIDS Res Hum Retroviruses* **21**, 98-102, doi:10.1089/aid.2005.21.98 (2005).

51 Gibbs, M. J., Armstrong, J. S. & Gibbs, A. J. Sister-scanning: a Monte Carlo procedure for assessing signals in recombinant sequences. *Bioinformatics* **16**, 573-582, doi:10.1093/bioinformatics/16.7.573 (2000).

52 Price, M. N., Dehal, P. S. & Arkin, A. P. FastTree 2--approximately maximum-likelihood trees for large alignments. *PLoS One* **5**, e9490, doi:10.1371/journal.pone.0009490 (2010).

53 Nguyen, L. T., Schmidt, H. A., von Haeseler, A. & Minh, B. Q. IQ-TREE: a fast and effective stochastic algorithm for estimating maximum-likelihood phylogenies. *Mol Biol Evol* **32**, 268-274, doi:10.1093/molbev/msu300 (2015).

- 1536 54 Rambaut, A., Lam, T. T., Max Carvalho, L. & Pybus, O. G. Exploring the  
1537 temporal structure of heterochronous sequences using TempEst  
1538 (formerly Path-O-Gen). *Virus Evol* **2**, vew007, doi:10.1093/ve/vew007  
1539 (2016).
- 1540 55 Sagulenko, P., Puller, V. & Neher, R. A. TreeTime: Maximum-likelihood  
1541 phylodynamic analysis. *Virus Evol* **4**, vex042, doi:10.1093/ve/vex042  
1542 (2018).
- 1543 56 Duchene, S. *et al.* Temporal signal and the phylodynamic threshold of  
1544 SARS-CoV-2. *Virus Evol* **6**, veaa061, doi:10.1093/ve/veaa061 (2020).
- 1545 57 Louca, S. & Doebeli, M. Efficient comparative phylogenetics on large  
1546 trees. *Bioinformatics* **34**, 1053-1055, doi:10.1093/bioinformatics/btx701  
1547 (2018).
- 1548 58 Kimura, I. *et al.* The SARS-CoV-2 Lambda variant exhibits enhanced  
1549 infectivity and immune resistance. *Cell Rep* **38**, 110218,  
1550 doi:10.1016/j.celrep.2021.110218 (2022).
- 1551 59 Niwa, H., Yamamura, K. & Miyazaki, J. Efficient selection for  
1552 high-expression transfectants with a novel eukaryotic vector. *Gene* **108**,  
1553 193-199, doi:10.1016/0378-1119(91)90434-d (1991).
- 1554 60 Yamasoba, D. *et al.* Neutralisation sensitivity of SARS-CoV-2 omicron  
1555 subvariants to therapeutic monoclonal antibodies. *Lancet Infect Dis* **22**,  
1556 942-943, doi:10.1016/S1473-3099(22)00365-6 (2022).
- 1557 61 Meng, B. *et al.* Altered TMPRSS2 usage by SARS-CoV-2 Omicron  
1558 impacts tropism and fusogenicity. *Nature*,  
1559 doi:10.1038/s41586-022-04474-x (2022).
- 1560 62 Reed, L. J. & Muench, H. A simple method of estimating fifty percent  
1561 endpoints. *Am J Hygiene* **27**, 493-497 (1938).
- 1562 63 Zahradnik, J. *et al.* A protein-engineered, enhanced yeast display  
1563 platform for rapid evolution of challenging targets. *ACS Synth Biol* **10**,  
1564 3445-3460, doi:10.1021/acssynbio.1c00395 (2021).
- 1565 64 Ozono, S., Zhang, Y., Tobiume, M., Kishigami, S. & Tokunaga, K.  
1566 Super-rapid quantitation of the production of HIV-1 harboring a  
1567 luminescent peptide tag. *J Biol Chem* **295**, 13023-13030,  
1568 doi:10.1074/jbc.RA120.013887 (2020).
- 1569 65 Kondo, N., Miyauchi, K. & Matsuda, Z. Monitoring viral-mediated  
1570 membrane fusion using fluorescent reporter methods. *Curr Protoc Cell*  
1571 *Biol* **Chapter 26**, Unit 26 29, doi:10.1002/0471143030.cb2609s50 (2011).
- 1572 66 Sano, E. *et al.* Cell response analysis in SARS-CoV-2 infected bronchial  
1573 organoids. *Commun Biol* **5**, 516, doi:10.1038/s42003-022-03499-2  
1574 (2022).
- 1575 67 Yamamoto, Y. *et al.* Long-term expansion of alveolar stem cells derived  
1576 from human iPS cells in organoids. *Nat Methods* **14**, 1097-1106,

1577 doi:10.1038/nmeth.4448 (2017).  
1578 68 Konishi, S. *et al.* Directed induction of functional multi-ciliated cells in  
1579 proximal airway epithelial spheroids from human pluripotent stem cells.  
1580 *Stem Cell Reports* **6**, 18-25, doi:10.1016/j.stemcr.2015.11.010 (2016).  
1581 69 Gotoh, S. *et al.* Generation of alveolar epithelial spheroids via isolated  
1582 progenitor cells from human pluripotent stem cells. *Stem Cell Reports* **3**,  
1583 394-403, doi:10.1016/j.stemcr.2014.07.005 (2014).  
1584 70 Deguchi, S. *et al.* Usability of polydimethylsiloxane-based microfluidic  
1585 devices in pharmaceutical research using human hepatocytes. *ACS*  
1586 *Biomater Sci Eng* **7**, 3648-3657, doi:10.1021/acsbiomaterials.1c00642  
1587 (2021).  
1588



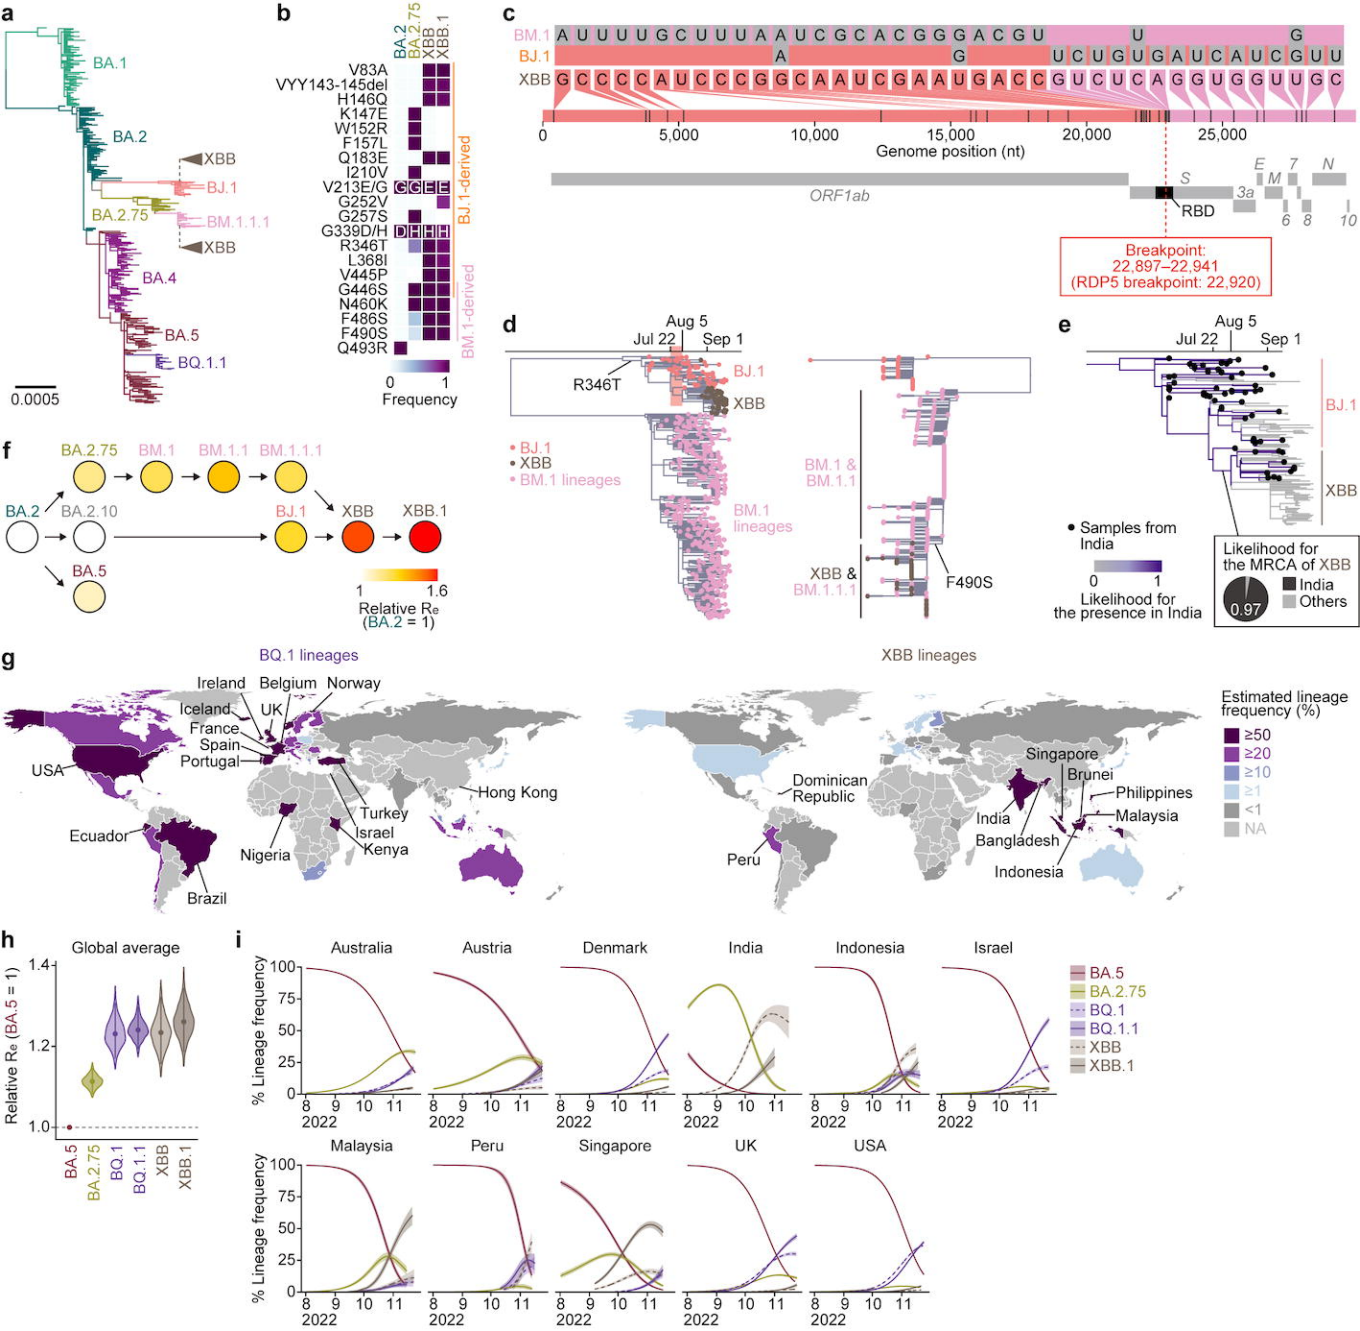



**a** BA.2 breakthrough infection sera (n=14)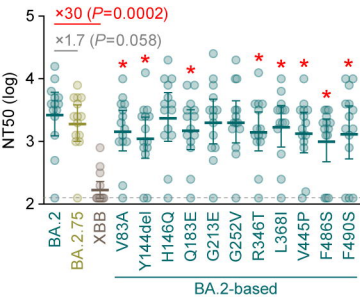**b** BA.5 breakthrough infection sera (n=20)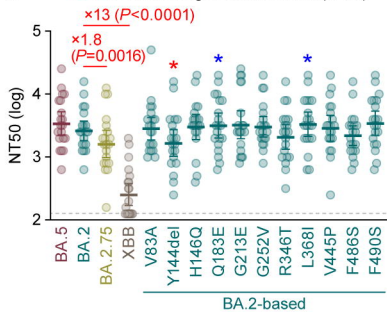**c** BA.2 infection sera (hamster) (n=12)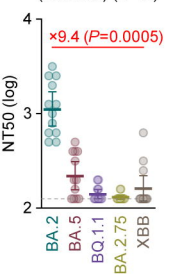

BA.5 infection sera (hamster) (n=12)

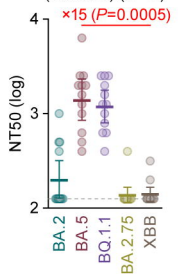

BQ.1.1 infection sera (hamster) (n=6)

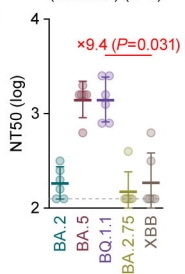

BA.2.75 infection sera (hamster) (n=12)

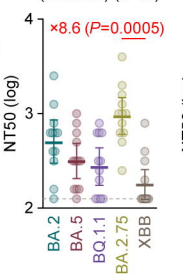

XBB infection sera (hamster) (n=6)

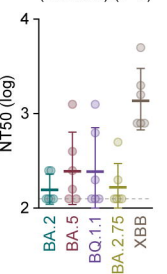**d** Antigenic cartography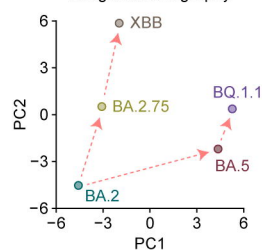

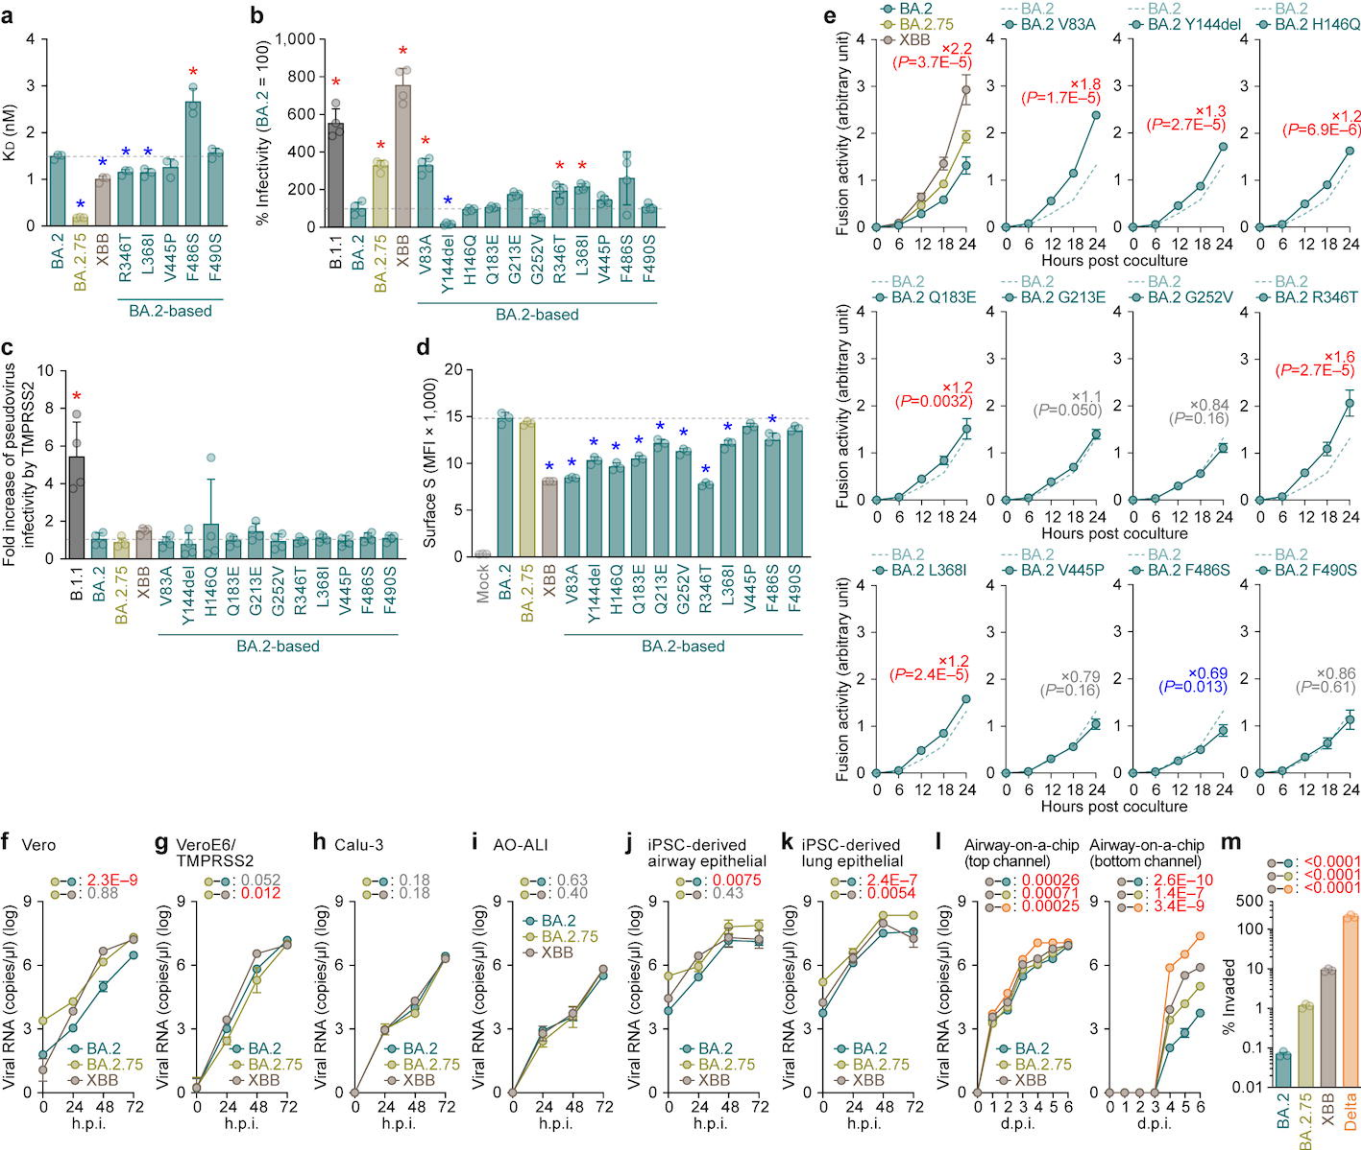

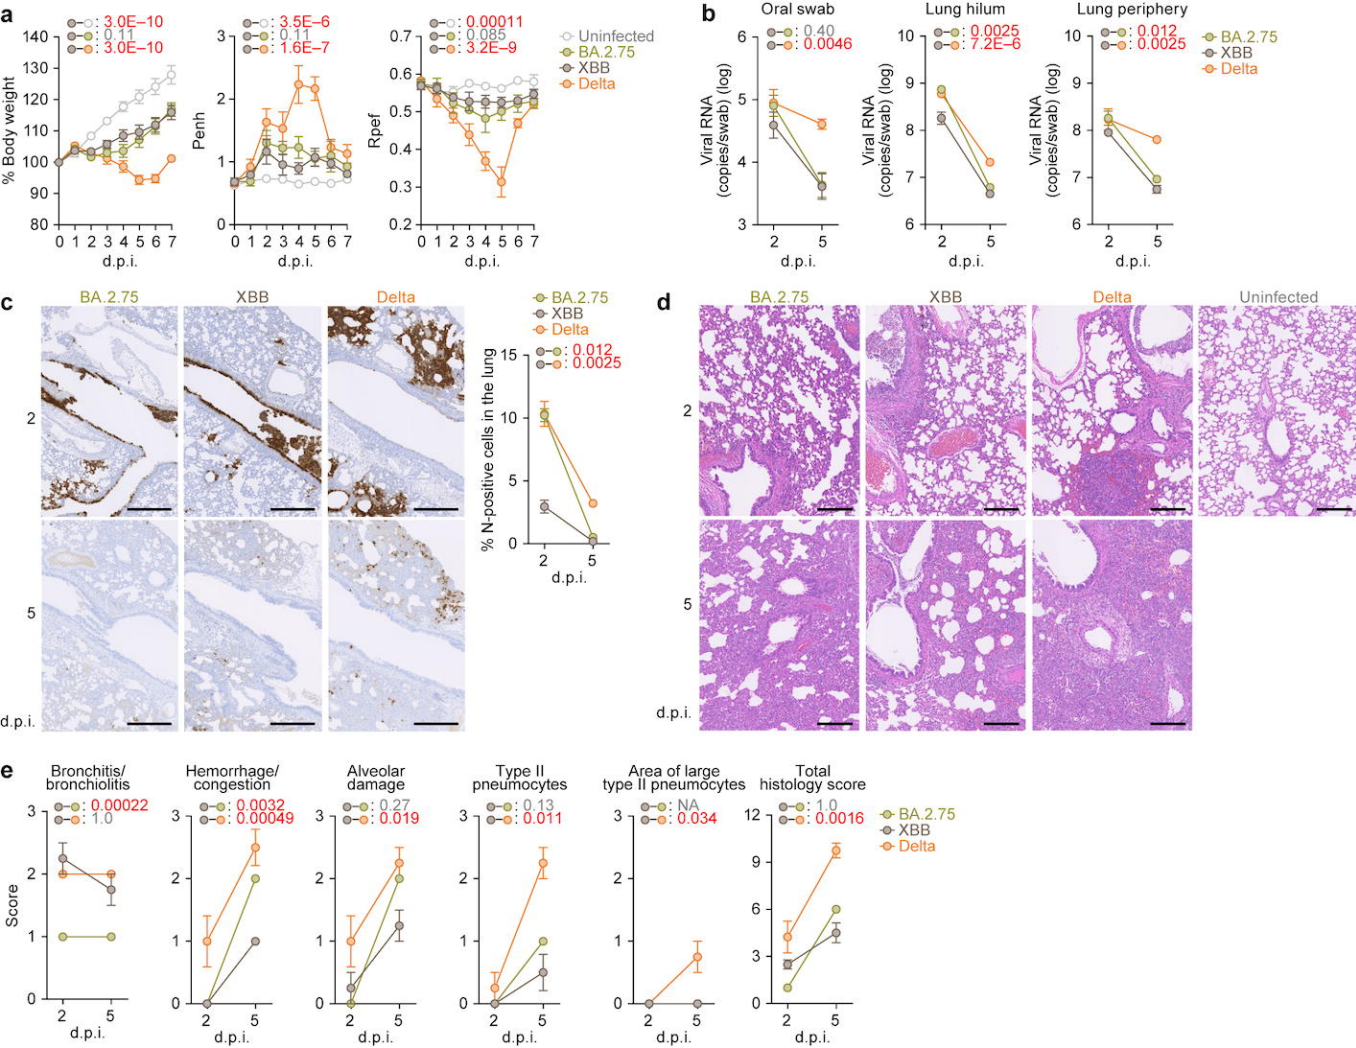

Source: https://www.biorxiv.org/content/10.1101/2022.12.27.521986v1.full.pdf
